# 1 Nanoscale structural organization and stoichiometry of the budding 2 yeast kinetochore

3 Konstanty Cieslinski\*<sup>1,2</sup>, Yu-Le Wu\*<sup>1,3</sup>, Lisa Nechyporenko<sup>1,4</sup>, Sarah Janice Hörner<sup>1,5</sup>, Duccio Conti<sup>6</sup>,  
4 Michal Skruzny<sup>1</sup>, Jonas Ries<sup>1,#</sup>

- 5 1. European Molecular Biology Laboratory, Cell Biology and Biophysics Unit, Heidelberg, Germany
- 6 2. DKFZ, Translational Radiation Oncology Unit, Heidelberg, Germany
- 7 3. Collaboration for joint PhD degree between EMBL and Heidelberg University, Faculty of  
8 Biosciences, Heidelberg, Germany
- 9 4. Institute of Pharmacy and Molecular Biotechnology, Heidelberg University, Heidelberg, Germany
- 10 5. Institute of Molecular and Cell Biology, Mannheim University of Applied Sciences and  
11 Interdisciplinary Center for Neuroscience, Heidelberg University, Heidelberg, Germany
- 12 6. Department of Mechanistic Cell Biology, Max Planck Institute of Molecular Physiology, Dortmund,  
13 Germany

14 \* equal contribution

15 # Correspondence: [jonas.ries@embl.de](mailto:jonas.ries@embl.de)

## 16 Abstract

17 Proper chromosome segregation is crucial for cell division. In eukaryotes, this is achieved by the  
18 kinetochore, an evolutionarily conserved multi-protein complex that physically links the DNA to spindle  
19 microtubules and takes an active role in monitoring and correcting erroneous spindle-chromosome  
20 attachments. Our mechanistic understanding of these functions and how they ensure an error-free  
21 outcome of mitosis is still limited, partly because we lack a comprehensive understanding of the  
22 kinetochore structure in the cell. In this study, we use single-molecule localization microscopy to  
23 visualize individual kinetochore complexes *in situ* in budding yeast. For major kinetochore proteins, we  
24 measured their abundance and position within the metaphase kinetochore. Based on this  
25 comprehensive dataset, we propose a quantitative model of the budding yeast kinetochore. While  
26 confirming many aspects of previous reports based on bulk imaging, our results present a unifying  
27 nanoscale model of the kinetochore in budding yeast.

## 28 Introduction

29 Cell division is a process of paramount importance for organismal life, ultimately ensuring the faithful  
30 propagation of the genome in space and time. Erroneous chromosome segregation can lead to  
31 aneuploidy, where daughter cells receive an aberrant karyotype which, in turn, may result in  
32 developmental defects or cell death (Santaguida and Amon, 2015). A multiprotein complex called  
33 kinetochore assembles at the centromere of each sister chromatid to generate robust connections  
34 between chromosomes and spindle microtubules (reviewed in (Musacchio and Desai, 2017)). The  
35 general architecture of the kinetochore is conserved in all eukaryotes (Drinnenberg et al., 2016; Hooff  
36 et al., 2017). A simple model to study its properties is the budding yeast, *Saccharomyces cerevisiae*,  
37 where the kinetochore assembles onto one nucleosome and is attached to one microtubule (Winey et  
38 al., 1995). Conversely, multiple copies of units analogous to the budding yeast kinetochore bind to many  
39 microtubules in other fungi and multicellular organisms (Zinkowski et al., 1991; Musacchio and Desai,  
40 2017). The kinetochore takes part in several processes during mitosis including maintaining proper  
41 chromosome attachment to the spindle, translating the pushing-pulling forces into chromosome  
42 movement and controlling the mitotic progression through the spindle assembly checkpoint

43 (Aravamudhan et al., 2015; Asbury, 2017; Joglekar et al., 2010). These functions are strongly dependent  
44 on the kinetochore's structure and its potential remodeling over the cell cycle (Conti et al., 2017;  
45 Dhatchinamoorthy et al., 2017; Joglekar et al., 2009).

46 Early electron microscopy studies defined three electron-dense regions in the kinetochore—the inner  
47 kinetochore, the outer kinetochore, and the fibrous corona (Rieder, 1982). In *S. cerevisiae*, where the  
48 corona is absent, the inner kinetochore includes the centromeric nucleosome containing an H3 variant  
49 called Cse4, the CBF3 complex (Cep3, Ndc10, Ctf13, Skp1), the Mif2 and Cnn1 module (Cnn1, Ctf3, Wip1,  
50 Mcm16/22, Mhf1/2), Nkp1/2, the COMA complex (Ctf19, Okp1, Mcm21, Ame1), and Chl4/Iml3. The  
51 outer kinetochore consists of the microtubule-interacting network built by Spc105, the MIND complex  
52 (Mtw1, Dsn1, Nnf1, Nsl1), the Ndc80 complex (Ndc80c; Ndc80, Spc24, Spc25, Nuf2) and the Dam1  
53 complex (Dam1c) ring (Musacchio and Desai, 2017; Figure 1A with human counterparts shown in the  
54 upper right corner of each protein).

55 Despite advances in the last decades in understanding kinetochore composition, a complete picture of  
56 its organization in cells is still unclear. A significant portion of the components of both human and  
57 budding yeast kinetochores have been already crystallized or analyzed by cryo-EM (for an overview see  
58 Dimitrova et al., 2016; Hinshaw and Harrison, 2019; Jenni and Harrison, 2018; Musacchio and Desai,  
59 2017; Yan et al., 2019). Most of the structural information regarding the full yeast kinetochore comes  
60 from electron microscopy (EM; Pesenti et al., 2022; Yatskevich et al., 2022) and fluorescence microscopy  
61 studies. EM studies revealed the overall shape of the budding yeast kinetochore (Gonen et al., 2012;  
62 McIntosh et al., 2013), but could not assign most proteins in the electron density maps (Hinshaw and  
63 Harrison, 2019; Yan et al., 2019). On the other hand, conventional fluorescence microscopy has provided  
64 information about the position of several kinetochore components along the spindle axis (Aravamudhan  
65 et al., 2014; Haase et al., 2013; Joglekar et al., 2009). However, this approach can only reveal the  
66 structural average of all kinetochores, because individual complexes are smaller than the resolution  
67 limit of conventional light microscopy (approximately 250 nm (Abbe, 1873)) and clustered. As a result,  
68 in budding yeast all 16 kinetochores are observed as one (during interphase) or two fluorescent spots  
69 (mitosis; Joglekar et al., 2006), and fine structural details of individual kinetochores cannot be observed.  
70 Thus, a comprehensive understanding of the structure of the kinetochore is still missing.

71 In the budding yeast kinetochore, built on a short centromere sequence (approximately 125 bps; Clarke  
72 and Carbon, 1980), the microtubule is captured by multiple copies of the Ndc80c and Dam1c. Precisely  
73 how many complexes are present, however, remains controversial, with estimates ranging significantly.  
74 To examine this question, previous studies used fluorescence microscopy to quantify the absolute copy  
75 numbers of the major kinetochore components. In this approach, the protein of interest was tagged with  
76 a suitable fluorescent protein. The brightness of the studied protein was then compared to a reference  
77 protein tagged with the same fluorophore (Joglekar et al., 2006, 2008; Lawrimore et al., 2011;  
78 Dhatchinamoorthy et al., 2017). These studies generally agreed that the outer kinetochore proteins are  
79 the most abundant and the inner kinetochore proteins the least abundant. Ndc80 has been shown to be  
80 present in 6 to 19 copies per kinetochore. Smaller or equal amounts were found for the MIND complex  
81 (4 to 7 copies) and Spc105 (4 to 5 copies). The COMA complex was shown to be present in 2 to 5 copies.  
82 Within the inner kinetochore, Cep3 was found to have 2 to 3.4 copies, Mif2 2 to 3.6 copies, and Cnn1 and  
83 Cse4 2 to 6 copies (Shivharaju et al., 2012; Wisniewski et al., 2014). The differences among the results  
84 may arise from the choice of the counting reference, cell cycle stage, fluorescent protein, method and  
85 optical system used (Joglekar et al., 2008). Such large discrepancies prevent generating a detailed  
86 structural model. Open fundamental questions include: How do the Mif2 and Cnn1 assembly pathways  
87 quantitatively contribute to the copy number of Ndc80c? How many COMA complexes exist within the  
88 budding yeast kinetochore?

89 Another extensively debated question in the field is the exact stoichiometry at centromeres of the  
90 histone protein Cse4. (Clarke and Carbon, 1980; Ng and Carbon, 1987; Keith and Fitzgerald-Hayes,  
91 2000). To date, a series of alternative structures have been proposed to define the nature of the  
92 centromeric nucleosome. These hypotheses include hemisome (Bui et al., 2012; Dalal et al., 2007),  
93 hexameric (Mizuguchi et al., 2007) or octameric configurations (Camahort et al., 2009), where a single  
94 or two copies of Cse4 are present (Black and Cleveland, 2011). With regards to Cse4 copy number,  
95 biochemical approaches have reported the presence of a single Cse4 nucleosome at centromeres  
96 (Furuyama and Biggins, 2007; Krassovsky et al., 2012). In contrast, *in vivo* studies showed a high  
97 variability of Cse4 copy number per kinetochore, ranging from 2 (Dhatchinamoorthy et al., 2017;  
98 Shivaraju et al., 2012; Wisniewski et al., 2014) up to 4 - 6 copies (Lawrimore et al., 2011). Interestingly,  
99 also the very first SMLM-based counting of Cnp1, the Cse4 homologue in fission yeast, reported 6 - 7  
100 Cnp1 copies per spindle microtubule (Camahort et al., 2009; Lando et al., 2012). Therefore, the identity  
101 and copy number of the centromeric nucleosome is still an unanswered question in the centromere and  
102 kinetochore fields.

103 Super-resolution microscopy, and specifically Single-Molecule Localization Microscopy (SMLM; Betzig  
104 et al., 2006; Hess et al., 2006; Rust et al., 2006), achieves nanometer resolution combined with molecular  
105 specificity, and has the potential to bridge this gap in our knowledge. It has been used to get structural  
106 insights into the organization of multi-protein complexes such as the nuclear pore complex (Szybonska  
107 et al., 2013), the endocytic machinery (Mund et al., 2018; Sochacki et al., 2017), centrioles (Sieben et al.,  
108 2018) or synaptic proteins (Dani et al., 2010). In this study, we use SMLM to determine the location of  
109 key proteins and their copy numbers with single kinetochore resolution in *S. cerevisiae* cells (Figure 1).  
110 From these data, we built a comprehensive model of how the major components are positioned and  
111 what their stoichiometry is in the budding yeast metaphase kinetochore *in situ*.

## 112 **Results**

### 113 **Individual kinetochores can be observed with SMLM**

114 In order to determine whether SMLM can be used to visualize individual kinetochores, we imaged yeast  
115 cells in which Ndc80 was endogenously tagged with mMaple, and Spc42 (spindle pole body protein)  
116 with GFP (Figure 1B). When we imaged unsynchronized cells, we observed that in interphase cells all  
117 kinetochores are packed within a small cluster with a size below the resolution limit of standard  
118 microscopy, with the tendency to organize into a rosette-like configuration similar to what is observed  
119 in human cells in early prometaphase (Figure 1B; Chaly and Brown, 1988; Jin et al., 2000; Bystricky et  
120 al., 2005). In metaphase, kinetochores did not generate a metaphase plate but rather organized into two  
121 sister kinetochore clusters (Figure 1B). In late mitosis, the separation of the sister kinetochore clusters  
122 increases (Figure 1B; Joglekar et al., 2006). At this late stage of division, their high density did not allow  
123 us to resolve individual kinetochores with SMLM. In conclusion, SMLM allows visualizing single  
124 kinetochores within the budding yeast spindle in interphase and metaphase.

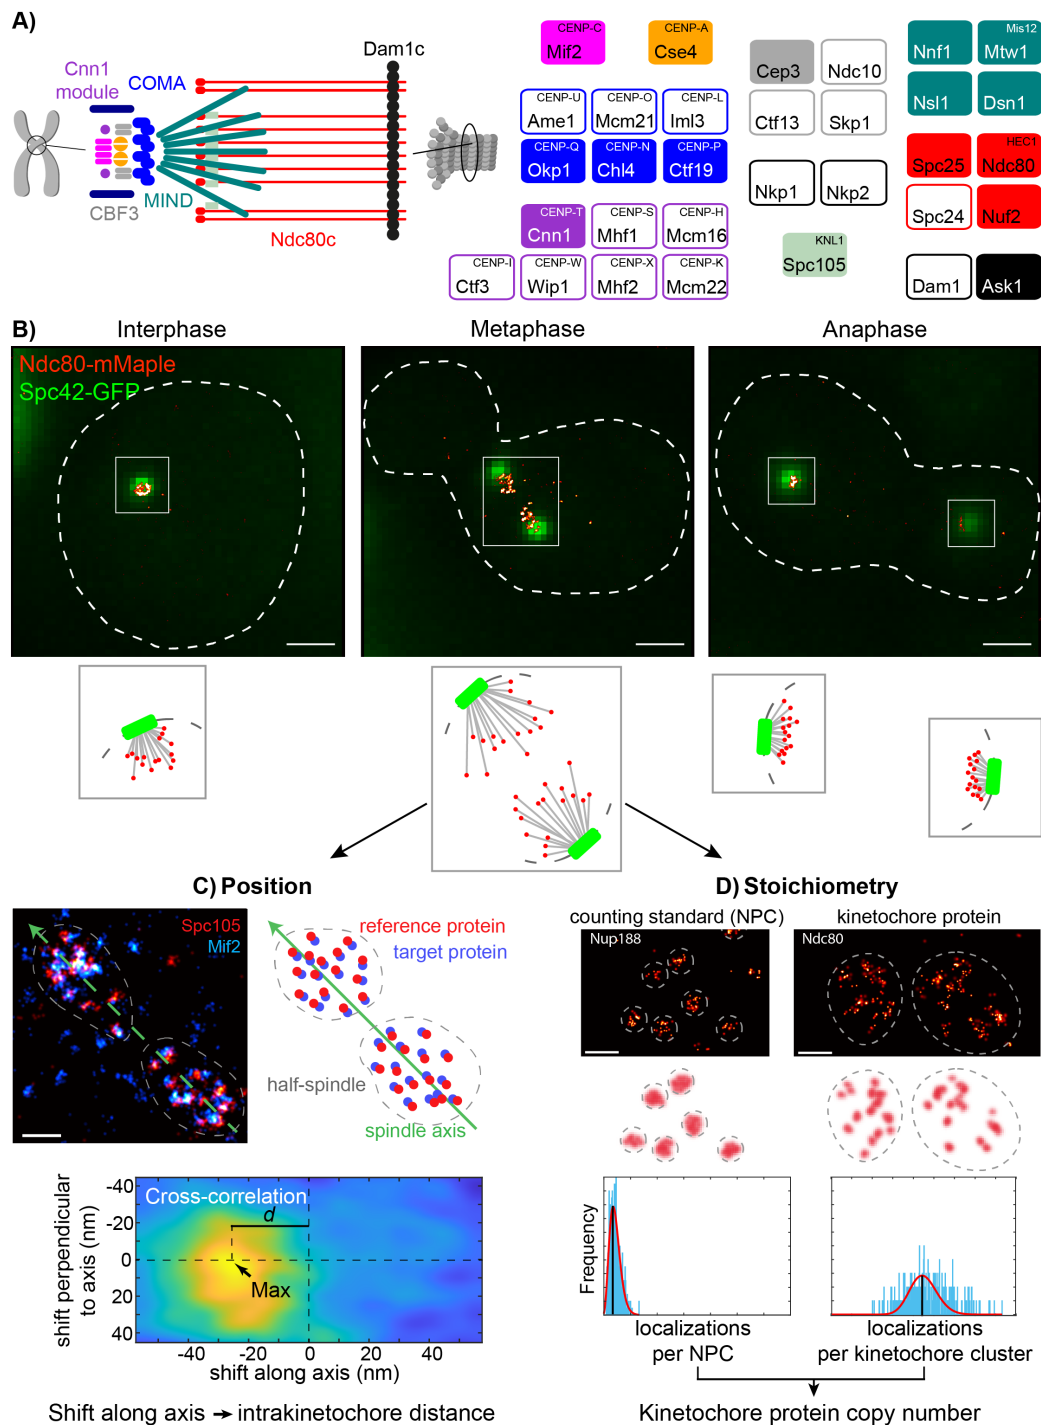

**Figure 1: Overview of the study.** **A. Protein composition of the budding yeast kinetochore.** Kinetochore proteins are grouped and color-coded by subcomplexes. Only opaquely colored components were measured in this study. Human counterparts are shown in a superscript. **B. Example kinetochore clusters.** Overlays of representative super-resolved images of the kinetochore protein Ndc80 (red) and the diffraction-limited spindle pole body protein Spc42 (green) at different stages of the cell cycle and corresponding cartoons of the budding yeast spindles. Scale bars: 1  $\mu\text{m}$ . **C. The position of kinetochore proteins along the spindle axis.** We labeled and imaged always the reference protein Spc105 (red) together with the target protein (cyan, Mif2 in this example). We manually segmented single kinetochore clusters, defined the spindle axis and calculated the image cross-correlation. The position of the cross-correlation peak corresponds to the average distance between reference and target proteins in the half spindle. **D. Stoichiometry of the budding yeast kinetochore.** We quantified the copy numbers of kinetochore proteins using the nuclear pore complex (NPC) component Nup188, which has 16 copies per NPC, as a counting reference standard. In each experiment, we mixed two strains in which either Nup188 or the target kinetochore protein were labeled with the same fluorescence protein tag mMaple. We then imaged both strains simultaneously. We calculated the ratio of mean localization counts per structural unit (either NPC or kinetochore cluster) between the two proteins. From the relative number of localizations and the known stoichiometry of Nup188, we computed the copy number of the target kinetochore protein. Scale bars: 200 nm.

## 126 Dual-color SMLM quantifies positions of kinetochore proteins along the 127 metaphase spindle axis

128 In order to resolve structural details of individual kinetochore complexes, we used dual-color super-  
129 resolution imaging of two kinetochore proteins along the spindle axis. The distances were measured in  
130 a single dimension, with a possible tilt of the spindle axis introducing only a minimal error (maximum  
131 error = 6.3%, mean error = 2.1%; see Figure S1 and Methods). We focused on essential kinetochore  
132 components and included proteins that have been mapped with diffraction-limited microscopy  
133 (Joglekar et al., 2009), for which we could improve the positioning accuracy, and proteins that have  
134 never been visualized previously. Unless indicated otherwise, we used Spc105, labeled with SNAP-tag  
135 and the organic dye AF647, as a super-resolved spatial reference to position all other proteins, labeled  
136 with mMaple, on the spindle axis. To this end, we analyzed each kinetochore cluster individually by  
137 reconstructing superresolution images for the reference and target protein and by determining their  
138 relative shifts by image cross-correlation (Figure 1C, Figure S2, and Methods). We only analyzed  
139 metaphase cells where both kinetochore clusters allowed for high-quality position measurements. As  
140 the two kinetochore clusters have an opposite orientation on the spindle axis, minor registration  
141 inaccuracies between the channels share the same amount but opposite signs, therefore cancelling each  
142 other out (Figure S2D). This allowed us to determine the pairwise distances between 15 pairs of  
143 kinetochore proteins, all labeled at their C-termini (Figure 2). We further validated this approach with  
144 an independent analysis, in which we directly measured the distance of the proteins in individual  
145 kinetochores (Figure S3) and obtained highly similar results. Our measurements of different  
146 kinetochore proteins were internally consistent, as the sum of the measured Ndc80 - Spc105 ( $13.6 \pm 1.2$   
147 nm; mean  $\pm$  SEM) and Spc105 - Ctf19 ( $14.9 \pm 1.7$  nm) distances is close to the measured Ndc80 - Ctf19  
148 distance ( $24.9 \pm 1.8$  nm; Figure 2 inset). These data agree reasonably well with previous diffraction-  
149 limited dual-color microscopy studies with noticeable exception of positions of MIND components (for  
150 comparison, see Table S1 and Figure S4; Joglekar et al., 2009). Furthermore, we found that the C-termini  
151 of Ndc80 and Nuf2 are in close proximity with a distance of  $3.3 \text{ nm} \pm 1.5 \text{ nm}$  (Figure 2), which agrees  
152 well with a distance of 3.6 nm, as determined from a crystal structure (Valverde et al., 2016), adding

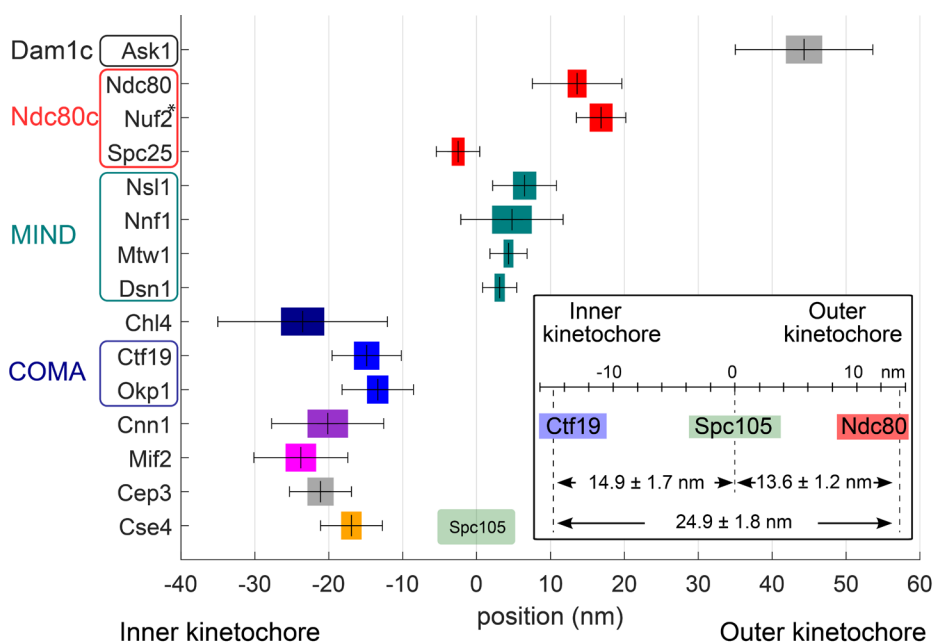

**Figure 2. Position of 15 kinetochore proteins along the spindle axis with Spc105 as a reference point.** All proteins were tagged at their C-termini. The mean distance is plotted with the standard error of mean (SEM, colored box) and standard deviations (SD, whiskers). The inset depicts control measurements showing consistency in pairwise distance measurements  $\pm$  SEM among three proteins. See Table 1 for values. \*The position of Nuf2 is based on the measured pair Ndc80-Nuf2.

153 another validation. In summary, these data show that SMLM dual-color imaging is suitable to measure  
154 intra-kinetochore protein distances in budding yeast.

155 We found the C-termini of Cse4 and Cep3 to be positioned within 1.5 nm away from each other at the  
156 centromeric site. Also, Mif2 and Cnn1 cluster together, which is consistent with their function within the  
157 inner kinetochore (Figure 2) but are around 3 nm away from the Cse4, towards the Cep3 site.  
158 Interestingly, we measured the position of Chl4 to be only 0.3 nm away from Mif2, but more distant from  
159 the COMA complex (8.9 nm). We find that Ctf19 and Okp1 (COMA components) are  $-14.9 \pm 1.7$  nm and -  
160  $13.4 \pm 1.4$  nm away from Spc105, respectively, towards the centromere (Figure 2).

161 Next, we found that Nnf1, Nsl1, Mtw1, and Dsn1, which all belong to the MIND complex, are between 3.1  
162 nm and 6.5 nm away from Spc105 in the outward direction (towards the microtubule). This is consistent  
163 with a crystal structure of MIND in yeast and human and with the known binding site of the KNL1<sup>Spc105</sup>  
164 C-terminus on the MIND complex (Dimitrova et al., 2016; Hornung et al., 2014; Kudalkar et al., 2015;  
165 Petrovic et al., 2016; Petrovic et al. 2014). While the C-terminus of Spc25 is adjacent to the C-termini of  
166 both Spc105 and MIND (Figure 2), the C-terminus of Ndc80 occupies a more outward position. Finally,  
167 the Ask1 subunit of Dam1c is positioned around 40 nm away from Spc105 in the microtubule direction.

**Table 1. Statistics of kinetochore protein positions along the spindle axis.** \*The position of Nuf2 is based on the measured pair Ndc80-Nuf2. SD: standard deviation, SEM: standard error of the mean, N: number of spindles.

| Protein            | Distance to Spc105 (nm) | SD   | SEM | N  |
|--------------------|-------------------------|------|-----|----|
| <b>Ask1</b>        | 44.3                    | 9.3  | 2.4 | 15 |
| <b>Ndc80</b>       | 13.6                    | 6.1  | 1.2 | 25 |
| <b>Nuf2*</b>       | 16.9                    | 3.3  | 1.5 | 5  |
| <b>Spc25</b>       | -2.5                    | 2.9  | 0.8 | 13 |
| <b>Nsl1</b>        | 6.5                     | 4.3  | 1.5 | 8  |
| <b>Nnf1</b>        | 4.8                     | 6.9  | 2.6 | 7  |
| <b>Mtw1</b>        | 4.3                     | 2.5  | 0.6 | 17 |
| <b>Dsn1</b>        | 3.1                     | 2.3  | 0.6 | 13 |
| <b>Chl4</b>        | -23.5                   | 11.5 | 2.9 | 16 |
| <b>Ctf19</b>       | -14.9                   | 4.7  | 1.7 | 8  |
| <b>Okp1</b>        | -13.4                   | 4.8  | 1.4 | 12 |
| <b>Cnn1</b>        | -20.1                   | 7.6  | 2.7 | 8  |
| <b>Mif2</b>        | -23.8                   | 6.3  | 2.0 | 10 |
| <b>Cep3</b>        | -21.1                   | 4.2  | 1.7 | 6  |
| <b>Cse4</b>        | -16.9                   | 4.2  | 1.3 | 10 |
| <b>Ctf19-Ndc80</b> | -24.9                   | 8.5  | 1.8 | 23 |

168  
169 Our data also contain information about the distribution widths of kinetochore proteins perpendicular  
170 to the spindle axis. We extracted this information using auto-correlation analysis. We found that the  
171 width of the distribution correlates to the position of the protein along the spindle axis (Figure S5). Using  
172 auto-correlation of simulated ring distributions with different radii as references, we found that most  
173 inner kinetochore proteins are distributed within a radius of 10 to 15 nm of the kinetochore center and  
174 most outer kinetochore proteins within a radius of ~15 nm. The wider distributions of the outer  
175 kinetochore proteins can be explained by the presence of microtubule, which has a radius of ~12.5 nm,  
176 occupying the central space.

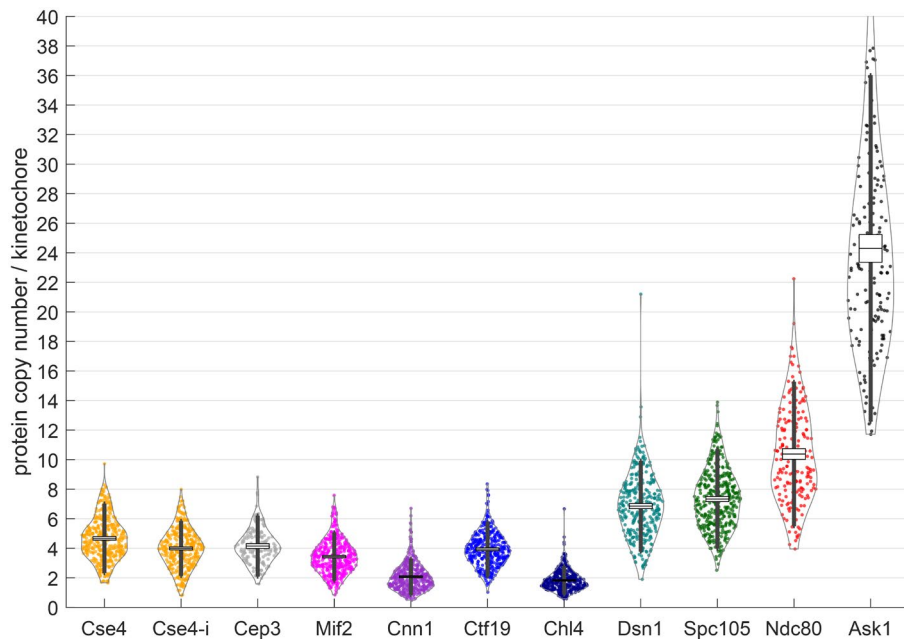

**Figure 3. Protein copy numbers per kinetochore** measured with Nup188-mMaple as a counting reference standard. Each data point corresponds to one kinetochore cluster. All proteins were tagged at their C-termini, except Cse4-i that was tagged internally. Boxes denote average copy numbers and standard error of means, and whiskers denote standard deviations. For each protein, two independent experiments were performed and pooled (see Methods for details).

## 177 Counting kinetochore protein copy numbers with quantitative SMLM

178 In order to estimate the protein copy numbers of the major kinetochore components, we used a  
179 quantitation approach based on reference standards for super-resolution counting (Thevathasan et al.,  
180 2019). Here, the target complex is imaged under identical conditions as the reference standard, tagged  
181 with the same fluorophore (mMaple). The copy number of the unknown complex can be directly  
182 calculated from the known copy number of the counting standard and the relative number of detected  
183 localizations. We selected Nup188, a protein component of the nuclear pore complex (NPC), as a bright  
184 and easy to segment counting reference complex (Figure 1C; Thevathasan et al., 2019). Nup188 has 16  
185 copies per budding yeast NPC (Kim et al., 2018). We mixed the reference strains containing Nup188-  
186 mMaple and Abp1-GFP as an identification marker with the target strains containing mMaple-labeled  
187 kinetochore proteins and imaged them on the same coverslip to ensure identical imaging conditions.  
188 We further improved the accuracy by employing highly homogenous illumination (Deschamps et al.,  
189 2016) throughout the entire field of view. We usually acquired images of 600 NPCs and 200 kinetochore  
190 clusters per experiment. We only analyzed kinetochore clusters that were close to the focal plane to  
191 ensure that the analyzed kinetochore proteins did not exceed the imaging depth (see Figure S1, Figure  
192 S6 and Methods). This allowed us to precisely calculate the copy numbers of kinetochore proteins.

193 For the inner kinetochore, we first quantified Cse4. Previous reports have indicated that only internal  
194 genetically-encoded fluorescent tagging of Cse4 is compatible with its physiological function, while N-  
195 or C-terminal tagging renders cells less viable (Wisniewski et al., 2014). However, in our experiments,  
196 we found that both internal and C-terminal tagging of Cse4 were compatible with viability. Furthermore,  
197 our counts were essentially identical, with  $4.2 \pm 2.0$  (standard deviation; SD) copies of the histone Cse4  
198 when it is tagged internally and  $4.8 \pm 2.4$  (Figure 3) when the tag is localized at its C-terminus. Cep3 was  
199 found in  $4.2 \pm 2.1$  copies. Mif2 and Cnn1 are present in  $3.5 \pm 1.7$  and  $2.1 \pm 1.3$  copies/kinetochore,  
200 respectively. The COMA complex component Ctf19 has  $4.1 \pm 1.9$  copies, and the COMA and Mif2 binder  
201 Chl4 is present in  $1.8 \pm 1.0$  copies. The outer kinetochore proteins are present in higher copy numbers:  
202  $7.6 \pm 3.4$  copies of Spc105,  $7.2 \pm 3.2$  of Dsn1,  $10.9 \pm 5.0$  of Ndc80 and  $24.9 \pm 11.0$  of Ask1 (Figure 3).

203 Different lifetimes of the Nup188 and kinetochore proteins could lead to different maturation  
 204 efficiencies of the mMaple tag and consequently to systematic errors in the counting measurements. To  
 205 investigate the effect of tag maturation, we transiently stopped protein translation with 250  $\mu\text{g/ml}$   
 206 cycloheximide (CHX) and performed our counting measurements one hour after this treatment (Figure  
 207 S3). Although we observed minor changes in copy numbers, the overall effect of CHX was small. The  
 208 noticeable exception was internally tagged Cse4 for which 30 – 40% reduction of the signal was seen.  
 209 We conclude that tag maturation does not grossly affect our measurements of protein copy number. We  
 210 have not noticed any growth defects that may have arisen from the tagging in our experiments, but we  
 211 do not exclude a possibility of minor effects. However, our data is consistent with the previous  
 212 measurements suggesting that our C-terminal tagging did not introduce any artefacts (Joglekar et al.,  
 213 2006, 2008, 2009; Lawrimore et al., 2011; Pekgöz Altunkaya et al., 2016; Dhatchinamoorthy et al.,  
 214 2017).

## 215 Quantitative model of the budding yeast kinetochore

216 We then integrated all protein copy numbers (Figure 3) and protein-protein distance measurements  
 217 along the spindle axis (Figure 2) in a model of the structural organization of the budding yeast  
 218 kinetochore (Figure 4). Based on their close proximity (Figure 2), their known tendency to dimerize  
 219 (Cohen et al., 2008) and non-centromeric DNA interactions we positioned at the centromeric site two  
 220 copies of Cse4, a dimeric CBF3 subunit (with two Cep3 dimers), Mif2 dimer and two copies of Cnn1.  
 221 Roles of the additional copies of Cse4, Mif2, CBF3 and COMA molecules detected by our measurements  
 222 (indicated in Figure 4 by dashed lines) needs to be further investigated. In addition, we only included  
 223 essential structural information (protein structure and binding partners) well established in the field.  
 224 Specifically, we did not divide the inner kinetochore components by their centromeric-proximal, peri-  
 225 centromeric or other nuclear localization. Next, we placed all C-termini of MIND proteins away from  
 226 COMA. We then positioned seven copies of Spc105 and of MIND and ten globular Spc25-containing ends  
 227 of Ndc80c in close proximity to each other. Four unbound Ndc80c were left for Cnn1 binding. Finally,  
 228 we present Dam1 complexes as an oligomeric structure surrounding the microtubule.

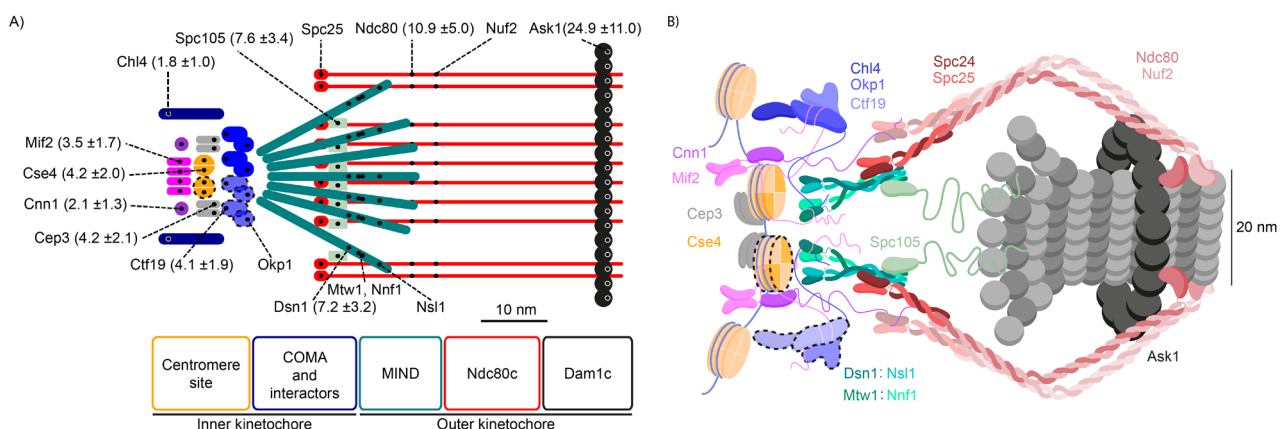

**Figure 4. Structural model of the budding yeast kinetochore. A. Quantitative schematic model** based on the position and protein copy numbers measured with SMLM. The position of the label is shown as a small black dot. Values in the brackets are the estimates of the number of proteins per kinetochore  $\pm$  SD. **B. Illustrative structural model** that we built by integrating our position and copy number measurements with previous models (Jenni et al., 2017; Fischböck-Halwachs et al., 2019; Hamilton et al., 2019; Ustinov et al., 2020). Dashed lines indicate potentially accessory (non-centromeric) copies (see Discussion for details). For simplicity, only two copies of COMA, MIND and Spc105 and four copies of Ndc80c are shown in B.



## 229 **Discussion**

230 In this study, we used single-molecule localization microscopy to position 15 kinetochore proteins along  
231 the spindle axis length in metaphase and measured the copy numbers of 10 representative kinetochore  
232 components (Figure 4), giving new insights into the structural organization of the budding yeast  
233 kinetochore *in vivo*.

### 234 **Kinetochore subunits are organized functionally along the spindle axis**

235 Using dual-color SMLM, we mapped the relative positions of 15 kinetochore proteins along the spindle  
236 axis with nanometer precision. The resulting position map clearly showed that the structural  
237 organization of kinetochore proteins correlated with their function and confirmed the general structure  
238 of the inner and the outer kinetochore. Kinetochore proteins known to interact with each other were  
239 found in close proximity in our analysis, validating their interactions and our approach.

240 Within the centromere-proximal region, which is more than 20 nm away from the outer kinetochore  
241 and the reference protein Spc105, Cse4 and CBF3 (measured with its constituent Cep3) colocalize with  
242 each other as well as with the C-termini of both outer kinetochore receptors Mif2 and Cnn1. The Cep3  
243 dimer, within the CBF3 complex, binds CDEIII DNA and participates in Cse4-containing centromere  
244 deposition (Leber et al., 2018; Yan et al., 2018; Zhang et al., 2018; Hinshaw and Harrison, 2019). Cnn1  
245 does not seem to bind the centromeric nucleosome directly but its localization depends on Mif2  
246 (Schmitzberger et al., 2017). These generate the base for further kinetochore assembly. Additionally, we  
247 find Chl4 within the centromere-proximal region as well, which is in line with Chl4 interacting with Mif2,  
248 the Cse4-containing nucleosome and, electrostatically, with DNA (McKinley et al., 2015; Pentakota et al.,  
249 2017). The COMA complex (as measured with Ctf19 and Okp1) occupies the intermediate position, 15  
250 to 20 nm from Spc105, bridging the inner with the outer kinetochore (Hinshaw and Harrison, 2019;  
251 Hornung et al., 2014). The outer kinetochore components (Spc105, MIND, Ndc80c, Dam1c) are more  
252 distal from the centromere and create the microtubule-interacting module, with the Ndc80c and Dam1c  
253 directly binding the microtubule surface (Cheeseman et al., 2006; Ciferri et al., 2008; Wei et al., 2007).  
254 All C-termini of the MIND complex are localized more than 10 nm away from COMA, suggesting that all  
255 N-terminal regions of MIND proteins lie relatively close to the complex. This is supported by numerous  
256 previous biochemical and optical studies (Aravamudhan et al., 2014; Dimitrova et al., 2016; Petrovic et  
257 al., 2016). The distance between the position of COMA and the C-termini of MIND implies a possible tilt  
258 between the longer axis of MIND and spindle as the total length of MTW1 is around 20 nm (Hornung et  
259 al., 2011). The structured segment of Spc105, the reference point, is positioned close to the C-termini of  
260 MIND, as was proposed previously using structural approaches (Petrovic et al., 2014). The Ndc80c is an  
261 elongated heterotetramer. The C-termini of two of its constituents (Spc25 and Ndc80) are 14.1 nm away  
262 from each other, a few nanometers less than the maximum length of this region observed in the purified  
263 sample (Wei et al., 2005; Valverde et al., 2016). The discrepancy between structural data of MIND and  
264 Ndc80c in our measurements can be explained as an existing tilt of both complex to the spindle axis. The  
265 tilt may have an implication in response to a tension during bi-orientation and in accommodation of  
266 Ndc80c binding to a microtubule surface. Based on the distance between Okp1 and Ndc80 the tilt can  
267 be estimated to be around 46 degrees. Finally, another complex assembles around the positive end of a  
268 spindle microtubule—Dam1c, placed some 40 nm outward from Spc105. As its maximum outer  
269 diameter is around 50 nm (Ramey et al., 2011), Ndc80c must overcome this barrier in order to reach  
270 the microtubule surface.

271 Generally, our results align with previous biochemical complex reconstitutions, protein interaction  
272 studies and with the majority of optics-based distance measurements. Compared to previous optical  
273 measurements, the tenfold higher resolution in our study greatly improved the accuracy of position

274 estimates with the single-kinetochore resolution removing a bias from proteins that are not  
275 incorporated in kinetochores but nonspecifically enriched in the spindle region. Thus, we found the C-  
276 termini of the MIND complex positioned within the outer kinetochore region between Spc105 and the  
277 Ndc80c. Here, the C-terminus of Dsn1 highly overlap with Spc105 position, whereas Nnf1, Mtw1, Nsl1  
278 C-termini extend towards the position of Ndc80. This adjusts a previous study that measured the  
279 distance between the diffraction limited spots of fluorescently-tagged kinetochore proteins in living  
280 cells and found the C-termini of Mtw1, Nsl1 and Dsn1 7 nm away from Spc105 in the direction of the  
281 centromere, whereas Nnf1 was shown to fully colocalize with Spc105 (Joglekar et al., 2009; Table S1  
282 and Figure S4).

283 Our results on COMA and Ndc80c are also compatible with previous studies, but we add position  
284 information about important proteins that have not yet been mapped, namely the Cse4 C-terminus, Cef3,  
285 Mif2, Cnn1 and Chl4.

## 286 **Copy numbers of the major kinetochore components**

287 The quantitative SMLM counting approach recently developed in our lab (Thevathasan et al., 2019)  
288 allowed us to precisely measure the copy number of specific proteins per kinetochore (Figure 3). One  
289 highly debated question in the field is the composition of the centromeric nucleosome and, with this, the  
290 copy number of Cse4 within individual kinetochores. There is a strong disagreement between  
291 biochemical and in-situ assays. Using chromatin immunoprecipitation (ChiP), only a single centromere-  
292 specific nucleosome can be recovered (two Cse4 copies; Furuyama and Biggins, 2007; Krassovsky et al.,  
293 2012; Pekgöz Altunkaya et al., 2016), which is also supported by a disc-like shape structure of the  
294 nucleosome observed by electron microscopy within a yeast metaphase spindle (McIntosh et al., 2013).  
295 On the other hand, microscopy data point to higher copy numbers of Cse4, exceeding the expected single  
296 centromere-specific nucleosome per kinetochore (Lawrimore et al., 2011). ChiP methods may not be  
297 able to detect the additional Cse4 due to their limit of detection (Lawrimore et al., 2011).

298 In our study, we find up to four copies of Cse4 per kinetochore (Figure 3), independently of whether  
299 tagging was internal (near the N-terminus) or at the C-terminus (Wisniewski et al., 2014) though the  
300 decrease of a copy number was observed upon cycloheximide treatment (Figure S7). To obtain further  
301 information about the centromere environment, we measured the copy numbers of the Cse4-binders  
302 Mif2 and Cep3 (CBF3 complex). We found that Cep3 have an equal copy number of 4 per kinetochore  
303 and Mif2 may be present as two dimers (four copies). The CBF3 complex containing two Cep3 dimers  
304 was shown to potentially allocate to a kinetochore (Yan et al., 2018). However, Cep3 exhibits also non-  
305 kinetochore localization (Joglekar et al., 2006). It is worth noting that in other organisms the CENP-C  
306 dimer may interact with two centromeric nucleosomes distinguishing the budding yeast centromere  
307 even more (Carroll et al., 2010; Guse et al., 2011; Watanabe et al., 2019; Ali-Ahmad et al., 2019; Walstein  
308 et al., 2021). Our study supports the notion that, among other inner kinetochore components, non-  
309 centromeric Cse4 may play a role in maintaining the “point” centromere by serving as a spare module  
310 (as discussed in Scott and Bloom, 2014).

311 In our study, we found four copies of Ctf19 but only two copies of Chl4 per kinetochore. Structural  
312 studies have shown only two COMA complexes within a kinetochore (Hinshaw and Harrison, 2019).  
313 Thus, we placed additional COMA copies as accessory (non-centromeric; Figure 4). It is widely accepted  
314 that N-termini of both Mif2 protein and COMA subunits allow and regulate assembly of the outer  
315 kinetochore module (Dimitrova et al., 2016; Petrovic et al., 2016; Przewloka et al., 2011; Screpanti et al.,  
316 2011). With a total of two interaction sites from a Mif2 dimer and two COMA, a budding yeast  
317 kinetochore may build up to four copies of MIND. This would leave additional copies unbound. However,  
318 crystallographic packing of MIND reveals potential oligomerization (Dimitrova et al., 2016) allowing us  
319 to place all complexes within the kinetochore. This in turn would bring equal or similar amount of

320 Spc105 and Ndc80 complexes (Petrovic et al., 2014). Indeed, we observed 6 - 8 MIND complexes and an  
321 equal number of Spc105. Consistently with others (Joglekar et al., 2006; Dhatchinamoorthy et al., 2017)  
322 we found more Ndc80 than Spc105 or MIND per kinetochore. However, the ratio between estimated  
323 copy numbers of Cse4 and Ndc80 in the current analysis is 2.5. Thus, it is different from in the  
324 aforementioned studies where Ndc80 is 4 times more abundant. The additional 2 Ndc80 can be bound  
325 by the last outer kinetochore receptor Cnn1. In regional kinetochores, CENP-T, the Cnn1 orthologue,  
326 recruits up to three Ndc80c to the outer kinetochore (Huis in 't Veld et al., 2016). In budding yeast, each  
327 Cnn1 can bind two Ndc80c (Pekgöz Altunkaya et al., 2016). The binding is regulated by Cdk1- and Mps1-  
328 dependent phosphorylation of Cnn1 (Malvezzi et al., 2013). The decreasing activity of the  
329 aforementioned kinases may allow the Cnn1-Ndc80 interaction to be more permissive. Our  
330 observations were limited only to metaphase. Therefore, the results are consistent with one Cnn1  
331 binding to a total of two to three Ndc80 per kinetochore. Yet, when Ndc80c copy numbers are estimated  
332 in Cnn1-deleted strains the copy number is not altered (Pekgöz Altunkaya et al., 2016;  
333 Dhatchinamoorthy et al., 2017) or the change may be minimal when MIND- Ndc80c binding pathway is  
334 impaired (Lang et al., 2018). This points to the redundancy of Cnn1 in budding yeast when the mitotic  
335 checkpoint is not compromised, or to a dynamic nature of the Ndc80-Cnn1 interaction.

336 We have estimated slightly higher copy number of Ask1 protein (a single Ask1 molecule is present in a  
337 Dam1c monomer) per kinetochore than an earlier work (16-20 copies; Joglekar et al., 2006). In general,  
338 17 copies form a complete microtubule-encircling Dam1c ring (Ng et al., 2018). However, different  
339 configurations of Dam1c oligomerization (one and two partial/complete rings) might exist on one  
340 microtubule even in the same cell (Ng et al., 2018). Two Dam1c rings on each microtubule have also  
341 been suggested (Kim et al., 2017). These altogether may explain the variation and higher mean copy  
342 number of Ask1 we quantified.

## 343 **Summary**

344 Taken together, we employed the high resolution of SMLM to substantially improve the accuracy of  
345 previous stoichiometry and intra-kinetochore distance estimates and obtained a comprehensive model  
346 of the structural organization of the kinetochore in budding yeast *in situ* (Figure 4), revising previous  
347 models (Jenni et al., 2017; Fischböck-Halwachs et al., 2019; Hamilton et al., 2019; Ustinov et al., 2020).  
348 This model adds additional valuable information to understand how the metaphase kinetochore is  
349 structurally organized *in situ* by overcoming the resolution limit present in the previous studies.

350 In an independent investigation, a similar methodology was used to assess protein composition and  
351 distances of *S. pombe* kinetochores (Virant et al., 2021). Their results are in excellent agreement with  
352 ours, as expected from the high conservation of kinetochore components across the two yeast species  
353 (Hooff et al., 2017), validating our respective approaches. One main difference is the Cse4:COMA ratio,  
354 which is 1:0.9 in budding yeast and 1:2.1 in fission yeast, pointing to intrinsic stoichiometry changes  
355 between point and regional kinetochores. In conclusions, our quantitative SMLM methods provide a  
356 strong basis for future studies, for instance how kinetochore components are organized perpendicular  
357 to the spindle axis and how this relates to the kinetochore-microtubule binding management, how  
358 structure and stoichiometry change throughout the cell cycle or how kinetochores are organized in  
359 other organisms. Our methods are not restricted to kinetochores, but will enable quantitative  
360 measurements of the stoichiometry and structure of other multi-protein assemblies *in situ*.

## 361 **Acknowledgements**

362 We thank Andrea Musacchio and Ulrike Endesfelder for feedback on the manuscript and Katharina  
363 Lindner for her work on the imaging of the dual color strains. This work was supported by the European

364 Research Council (grant no. ERC CoG-724489 to JR), the Human Frontier Science Program  
365 (RGY0065/2017 to JR) and the European Molecular Biology Laboratory.

## 366 **Author contributions**

367 K.C. and J.R. conceived the study. K.C., S.J.H., Y.-L.W. and M.S. performed experiments. K.C., Y.-L.W., L.N.,  
368 M.S. and J.R. analyzed data. K.C., Y.-L.W. and L.N. visualized the results. J.R. supervised the study. K.C., Y.-  
369 L.W., D.C., and J.R. wrote the manuscript with input from all authors.

## 370 **Methods**

### 371 **Yeast strain generation**

372 All strains used in the study (Table S2) were derived from *S. cerevisiae* MKY0100 strain (S288c  
373 derivative), a kind gift from the Kaksonen lab (University of Geneva). The strains for endogenous  
374 expression of fluorescently-tagged kinetochore proteins were created by homologous recombination  
375 using PCR-based C-terminal tagging cassettes (Janke et al., 2004). The cassettes were created by  
376 amplification of DNA regions of respective pFA6a plasmids (Mund et al., 2018) encoding mMaple  
377 (McEvoy et al., 2012) or SNAPf tag (Sun et al., 2011). The Cse4-mMaple-Cse4 strain was created  
378 analogically to Wisniewski et al., 2014. Cse4 and mMaple sequences were amplified by PCR and ligated  
379 into pFA6a vector replacing a tag sequence. Subsequently, PCR product encoding Cse4-mMaple-Cse4-  
380 HIS3MX6 was used to transform yeast competent cells by standard lithium-acetate protocol. Correct  
381 genome integrations in transformed yeast cells were checked by PCR.

### 382 **Sample preparation**

383 24 mm round coverslips were cleaned in HCl/Methanol overnight and then rinsed with water.  
384 Additionally, the coverslips were cleaned using a plasma cleaner to remove residual organic  
385 contaminations. Coverslips were then coated with 15  $\mu$ l of Concanavalin A (4 mg/ml in PBS; Sigma  
386 C2010), dried overnight at 37°C, and before use rinsed with water to remove residual PBS. The coverslip  
387 was covered with  $\sim$ 100  $\mu$ l of a cell suspension and incubated for 15 min.

388 For mMaple imaging, 2 ml of yeast logarithmic culture was grown in SC-Trp, spun down (2500 rpm, 3  
389 min) and resuspended in 100  $\mu$ l of the medium. In case of the control experiments with cycloheximide  
390 treatment, 250  $\mu$ g/ml of cycloheximide (in DMSO) was added to cells 1 hr before immobilization. Cells  
391 immobilized on Concanavalin A-coated coverslips were fixed in 4% paraformaldehyde, 2% sucrose in  
392 PBS for 15 min at room temperature. Fixation was quenched by 2 washes in 100 mM ammonium  
393 chloride, pH 7,5 in PBS for 20 min. Finally, the sample was rinsed with PBS several times. The coverslip  
394 was mounted on a microscope stage and covered with 50 mM Tris-HCl, pH 8 in 95% D<sub>2</sub>O.

395 For single- and dual-color imaging with SNAP, the cells were immobilized, fixed and washed the same  
396 way. Subsequently, the cells were permeabilized by 0.01% digitonin in 1% BSA solution for 30 min at  
397 room temperature under moist conditions. The sample was then washed in PBS. The sample was labeled  
398 with 1  $\mu$ M SNAP-Surface Alexa Fluor 647 in 1% BSA solution for 2 h at room temperature under moist  
399 conditions. Finally, the sample was washed in PBS 3x5 min. The sample was mounted in a microscope  
400 stage and covered with the blinking buffer consisting of 50 mM Tris-HCl, pH 8, 10 mM NaCl, 10% (w/v)  
401 D-glucose, 500  $\mu$ g/ml Glucose oxidase, 40  $\mu$ g/ml Catalase in 90% D<sub>2</sub>O (Thevathasan et al., 2019). The  
402 blinking buffer for Alexa Fluor single-color or dual-color imaging was supplemented with 35 mM or 15  
403 mM MEA (mercaptoethylamine), respectively.

## 404 **Microscopy**

405 The SMLM acquisitions were performed with the two custom-build microscopes, analogically as in  
406 (Mund et al., 2018), and with custom-developed EMU interface (Deschamps and Ries, 2020). Microscope  
407 1 was used for low-throughput single- and dual-color imaging. Before dual-color experiments, a bead  
408 calibration with 100 nm Tetra-Speck beads for a faithful channel overlay was performed. The splitting  
409 of the emission signals was achieved with a 640 nm long pass dichroic mirror. The signal from the 640  
410 nm or 562 nm laser excitation was collected through 676/37 nm or 600/60 nm emission bandpass  
411 filters, respectively. SMLM measurements were performed with 30 ms exposure time. The UV laser was  
412 adjusted automatically to keep the density of localizations constant (Mund et al., 2018). The cells with  
413 similarly bright sister kinetochore signals were chosen for each acquisition. Initially, we imaged the cells  
414 with the 640 nm laser until the localization density was sufficiently reduced. Then the 561 nm laser was  
415 switched on. Typically, we acquired 60000 frames and obtained ~35 nm localization precision for  
416 mMaple and 20 nm for Alexa Fluor 647.

417 Microscope 2 was primarily used for high-throughput single-color mMaple imaging. As in microscope 1,  
418 microscope 2 has several available channels - UV (405 nm), green (488 nm laser, 525/50 nm emission  
419 bandpass filter), orange (561 nm laser, 600/60 nm emission bandpass filter), red (640 nm - excitation  
420 and booster laser, 700/100 nm emission bandpass filter). A focus lock system based on a totally  
421 reflected IR laser beam was used to keep the focus constant. In order to keep the illumination of the  
422 entire field of view uniform we used homogenous and speckle-free illumination (Deschamps et al.,  
423 2016).

424 For protein counting experiments, two strains expressing the Nup188-mMaple standard and the target  
425 kinetochore protein labeled with mMaple were mixed and imaged simultaneously. 225 regions were  
426 imaged per coverslip, separated by at least 150  $\mu\text{m}$  to avoid premature mMaple activation. Every  
427 acquisition was performed with approximately 100 mW of the 561 nm laser, 25 ms exposure time and  
428 the UV laser adjusted automatically to result in a constant, but low density of activated fluorophores. All  
429 measurements were performed until all mMaple fluorophores had been activated and bleached. A  
430 snapshot of Ndc80-GFP (for kinetochores) or Abp1-GFP (for Nup188-mMaple strain) was automatically  
431 acquired, as well as a back focal plane image to exclude acquisitions with air bubbles.

## 432 **Single-molecule localization**

433 We used SMAP program package (Ries, 2020) for all data analysis. For single-molecule fitting, candidate  
434 localizations were detected by smoothing with a Difference of Gaussians filter and thresholding. Then,  
435 the signal was localized by fitting a Gaussian function with a homogeneous photon background, treating  
436 the size of the Gaussian as a free fitting parameter. Fluorophores spanning consecutive frames and thus  
437 likely stemming from the same fluorophore were merged (grouped) into a single localization. For  
438 experiments longer than 5000 frames, cross-correlation based sample drift correction was applied as  
439 described in (Mund et al., 2018). Super-resolution images were reconstructed by rendering each  
440 localization as a Gaussian with a size proportional to the localization precision. Finally, localizations  
441 were filtered by localization precisions to exclude dim emitters and by PSF sizes to exclude out-of-focus  
442 fluorophores. If the localization density in the first frames was above the single molecule regime, these  
443 frames were discarded.

444 Dual-color bead images were fitted as described above and used to calculate a projective transformation  
445 between the channels.

446 For high-throughput data we extracted additional parameters for quality control such as the number of  
447 localizations and the median localization precision, photon count, PSF size and background, and used

448 them in combination with the BFP images to exclude poor measurements that resulted from air bubbles  
449 in the immersion oil or acidification of the buffer.

## 450 **Z-position bead calibration**

451 The preparation of the bead sample is similar to the 3D bead calibration described in (Thevathasan et  
452 al., 2019). Briefly, Tetra-Speck beads (0.75  $\mu\text{L}$ ; catalog no. T7279, Thermo Fisher) were diluted in 360  $\mu\text{L}$   
453  $\text{H}_2\text{O}$ , mixed with 40  $\mu\text{L}$  1 M  $\text{MgCl}_2$  and put on a coverslip in a custom-manufactured sample holder. After  
454 10 min, the mix was replaced with 400  $\mu\text{L}$   $\text{H}_2\text{O}$ . Using Micro-Manager (Edelstein et al., 2014), about 20  
455 positions on the coverslip were defined and the beads were imaged acquiring z stacks ( $-1$  to  $1$   $\mu\text{m}$ ,  
456 10 nm step size) using the same filters as above. Images of beads were then localized to quantify their  
457 PSF sizes. Based on the PSF sizes and the stack positions, the z positions of fluorophores can be  
458 calibrated (Figure S1D).

## 459 **Quantification of distances between kinetochore proteins**

460 We quantified distances between kinetochore proteins based on a cross-correlation analysis. Before the  
461 analysis, in a dual-color SMLM data set, localizations with localization precision  $> 20$  nm for Alexa Fluor  
462 647 and  $> 25$  nm for mMaple channels or PSF size  $< 100$  nm or  $> 160$  nm were removed. Only the in-focus  
463 structures (mean PSF size  $\leq 135$  nm) were kept for the analysis. One color/channel (usually the channel  
464 of Spc105 unless specified otherwise) was defined as the reference, and the other as the target. We  
465 started by manually collecting kinetochore clusters (sites) and grouped both kinetochore clusters of the  
466 same mitotic spindle as a pair (Figure S2A). For each pair, a line was manually drawn to represent the  
467 spindle axis, which the kinetochore clusters distributed along. Next, to take the opposite direction of  
468 chromosomes pulling by each kinetochore cluster of the pair into account, the axial direction was  
469 defined as pointing towards the center of the spindle (Figure S2A). As shown in Figure S2B, each  
470 kinetochore cluster/pair of kinetochore clusters went through the same analysis steps (Figure S2C and  
471 D) for quantifying the distance. First, we calculated the image cross-correlation between two  
472 reconstructed super-resolution images corresponding to the two channels for each kinetochore cluster  
473 separately. From the maximum position of the cross-correlation map we determined the average  
474 distance between the two proteins along the spindle axis. To exclude that residual transformation errors  
475 caused e.g., by chromatic aberrations, we always analyzed the two paired kinetochore clusters together.  
476 Due to their close proximity, we expect similar registration errors, which cancel out when calculating  
477 the average protein distance because of the opposite orientation of the kinetochore clusters. As a result,  
478 each spindle resulted in one average distance value. Using Spc105 as a reference in most data sets, we  
479 could position all measured proteins along the spindle axis. The number of experiments per kinetochore  
480 protein is summarized in Table 1 and Table S3.

## 481 **Estimation of the error introduced by axial tilts of spindle axes**

482 We first quantified the average width of kinetochore clusters based on a cylindrical distribution.  
483 Specifically, the 1D profile along the diameter of a cylinder convolved with a Gaussian function ( $\sigma$   
484 defined as the mean localization precision) was calculated. Such a profile was fitted to kinetochore  
485 clusters with the radius as a free parameter.

486 We localized emitters in the bead z-stacks acquired as described above to obtain their PSF sizes. We  
487 then fitted a quadratic curve to the scatter plot of the PSF sizes and z positions of beads. The fitted  
488 calibration curve describes the relation between z positions of localizations and PSF size.

489 The 1D profile of cylindrical distribution with the radius defined as the quantified average width of  
490 kinetochore clusters was plugged into the calibration curve to obtain a new calibration curve describing  
491 the relation between z position of a kinetochore cluster and its mean PSF size. We then drew a line at

492 mean PSF size = 135 nm, which is the maximal possible value of the analyzed kinetochore clusters  
493 (Figure S1E). The maximal axial distance between kinetochore clusters in the same pair  $d_z^{max}$  is defined  
494 as the distance between the cross-points of the line and the calibration curve. The distance between the  
495 two kinetochore clusters in 3D was estimated as  $d = \sqrt{d_{xy}^2 + d_z^2}$ , where  $d_{xy}$  is the lateral distance  
496 between the two kinetochore clusters. The relative error introduced by the axial tilt is calculated as  
497  $\epsilon(\theta) = (d - d_{xy})/d$ , where  $\theta = \cos^{-1}(d_{xy}/d)$  is the tilt angle. The maximum tilt angle  $\theta^{max}$  was  
498 estimated based on mean lateral distance  $\overline{d_{xy}}$  and the estimated maximum axial distance  $d_z^{max}$ .  
499 The mean error is then estimated as  $\bar{\epsilon} = \left( \int_0^{\theta=\theta^{max}} \epsilon(\theta) \right) / \theta^{max}$ .

## 500 Estimations of the widths of kinetochore protein distributions

501 We used auto-correlation analysis to quantify the widths of kinetochore protein distributions. For each  
502 kinetochore cluster, we generated a 2D auto-correlation map. For each map, the auto-correlation values  
503 at shifts along the spindle axis  $< 25$  were summed per shift perpendicular to the spindle axis to yield the  
504 profile across the shifts. The high auto-correlation value at the shift = 0 was substituted by the value of  
505 its neighboring shift. The profile was then normalized to have the maximum of 1 before averaging over  
506 all kinetochore clusters of the same kinetochore proteins. To separate the real auto-correlation from its  
507 background, two Gaussian functions with a linked parameter  $\mu$  (position) were then fitted to the  
508 averaged profile. The function with the larger fitted parameter  $\sigma$  was considered as the background and  
509 then subtracted from the averaged profile. This profile for each analyzed protein is shown Figure S5.

510 We performed simulations to obtain reference auto-correlation profiles of ring distributions with  
511 different radii. Specifically, the 1D profile along the diameter of a ring was calculated per specified  
512 radius. To take the experimental localization precision into account, we acquired its binned distribution  
513 based on the mMaple channel over all the dual-color data sets. We then convolved the 1D profile with a  
514 Gaussian function ( $\sigma$  taken from the bin value) per bin. We then summed the profiles weighed by the  
515 frequency of the corresponding bins to form the final profiles. For each final profile, its auto-correlation  
516 was then calculated and is shown in Figure S5.

## 517 Protein copy number estimations

518 To differentiate the yeast strains on the same coverslip, proteins with different cellular distributions  
519 were tagged with mEGFP in the reference and target strains (Abp1 for the reference and a kinetochore  
520 protein for the target). The GFP signal was checked in the diffraction-limited channel. We then manually  
521 segmented the single structures of the reference (NPCs) and the target (kinetochore clusters) in  
522 respective strains. Before further analysis, localizations with localization precision  $> 15$  nm or PSF size  
523  $< 100$  nm or  $> 170$  nm were removed. Only the in-focus structures (mean PSF size  $\leq 135$  nm) were  
524 retained in the analysis. For the reference, NPCs at the edge of the nucleus or too close to neighboring  
525 structures were excluded. We then determined the number of localizations in a circular ROI of a  
526 diameter of 150 nm. For a target structure, we only picked kinetochore clusters that have two foci in the  
527 GFP channel to ensure metaphase kinetochore clusters. We then determined the number of localizations  
528 in the manually-created polygon enclosing the kinetochore cluster. When paired kinetochore clusters  
529 were too close to each other, they were segmented as one entity and its localizations were divided by 2.  
530 The copy number calibration factor for each dataset was calculated as  $F_n = L_n/N_n$ , based on the  
531 stoichiometry of Nup188 (Table S4). Here  $L_n$  is the mean quantified localizations per NPC and  $N_n=16$  is  
532 the known copy number of Nup188 per NPC. Then the copy number  $N_k$  of a target protein per  
533 kinetochore was calculated as  $N_k = \left( \frac{L_{kc}}{N_{kc}} \right) / F_n$ , where  $N_{kc} = 16$  is the number of kinetochores per  
534 kinetochore cluster and  $L_{kc}$  is the mean quantified localizations per kinetochore cluster. To take the

535 variation of the NPC localizations into account, the standard deviation of the kinetochore protein copy  
536 number was  $S = N_k \sqrt{(S_n/L_n)^2 + (S_k/L_k)^2}$ , where  $S_k$  and  $S_n$  are the standard deviations of the  
537 localizations for NPC and kinetochore protein  $L_k$  and  $L_n$  are the respective sample sizes. Finally, the  
538 pooled copy number and standard deviation of replicates were  $\bar{N}_k =$   
539  $(N_{k1}M_{k1} + N_{k2}M_{k2})/(M_{k1} + M_{k2})$  and  $\bar{S} = \sqrt{((M_{k1} - 1)S_1^2 + (M_{k2} - 1)S_2^2)/(M_{k1} + M_{k2} - 2)}$ ,  
540 respectively.

## 541 References

- 542 Abbe, E., 1873. Beiträge zur Theorie des Mikroskops und der mikroskopischen Wahrnehmung. Arch. Für Mikrosk.  
543 Anat. 9, 413–418.
- 544 Ali-Ahmad, A., Bilokapić, S., Schäfer, I.B., Halić, M., Sekulić, N., 2019. CENP-C unwraps the human CENP-A  
545 nucleosome through the H2A C-terminal tail. EMBO Rep. 20, e48913.  
546 <https://doi.org/10.15252/embr.201948913>
- 547 Aravamudhan, P., Felzer-Kim, I., Gurunathan, K., Joglekar, A.P., 2014. Assembling the Protein Architecture of the  
548 Budding Yeast Kinetochore-Microtubule Attachment using FRET. Curr. Biol. 24, 1437–1446.  
549 <https://doi.org/10.1016/j.cub.2014.05.014>
- 550 Aravamudhan, P., Goldfarb, A.A., Joglekar, A.P., 2015. The kinetochore encodes a mechanical switch to disrupt  
551 spindle assembly checkpoint signalling. Nat. Cell Biol. 17, 868–879. <https://doi.org/10.1038/ncb3179>
- 552 Asbury, C.L., 2017. Anaphase A: Disassembling Microtubules Move Chromosomes toward Spindle Poles. Biology 6,  
553 15. <https://doi.org/10.3390/biology6010015>
- 554 Betzig, E., Patterson, G.H., Sougrat, R., Lindwasser, O.W., Olenych, S., Bonifacino, J.S., Davidson, M.W., Lippincott-  
555 Schwartz, J., Hess, H.F., 2006. Imaging Intracellular Fluorescent Proteins at Nanometer Resolution. Science  
556 313, 1642–1645. <https://doi.org/10/dd8dkd>
- 557 Black, B.E., Cleveland, D.W., 2011. Epigenetic Centromere Propagation and the Nature of CENP-A Nucleosomes.  
558 Cell 144, 471–479. <https://doi.org/10.1016/j.cell.2011.02.002>
- 559 Bui, M., Dimitriadis, E.K., Hoischen, C., An, E., Quénet, D., Giebe, S., Nita-Lazar, A., Diekmann, S., Dalal, Y., 2012. Cell-  
560 Cycle-Dependent Structural Transitions in the Human CENP-A Nucleosome In Vivo. Cell 150, 317–326.  
561 <https://doi.org/10.1016/j.cell.2012.05.035>
- 562 Bystricky, K., Laroche, T., van Houwe, G., Blaszczyk, M., Gasser, S.M., 2005. Chromosome looping in yeast telomere  
563 pairing and coordinated movement reflect anchoring efficiency and territorial organization. J. Cell Biol.  
564 168, 375–387. <https://doi.org/10.1083/jcb.200409091>
- 565 Camahort, R., Shivaraju, M., Mattingly, M., Li, B., Nakanishi, S., Zhu, D., Shilatifard, A., Workman, J.L., Gerton, J.L.,  
566 2009. Cse4 Is Part of an Octameric Nucleosome in Budding Yeast. Mol. Cell 35, 794–805.  
567 <https://doi.org/10.1016/j.molcel.2009.07.022>
- 568 Carroll, C.W., Milks, K.J., Straight, A.F., 2010. Dual recognition of CENP-A nucleosomes is required for centromere  
569 assembly. J. Cell Biol. 189, 1143–1155. <https://doi.org/10.1083/jcb.201001013>
- 570 Chaly, N., Brown, D.L., 1988. The prometaphase configuration and chromosome order in early mitosis. J. Cell Sci.  
571 91 (Pt 3), 325–335. <https://doi.org/10.1242/jcs.91.3.325>
- 572 Cheeseman, I.M., Chappie, J.S., Wilson-Kubalek, E.M., Desai, A., 2006. The Conserved KMN Network Constitutes the  
573 Core Microtubule-Binding Site of the Kinetochore. Cell 127, 983–997.  
574 <https://doi.org/10.1016/j.cell.2006.09.039>
- 575 Ciferri, C., Pasqualato, S., Screpanti, E., Varetti, G., Santaguida, S., Dos Reis, G., Maiolica, A., Polka, J., De Luca, J.G., De  
576 Wulf, P., Salek, M., Rappsilber, J., Moores, C.A., Salmon, E.D., Musacchio, A., 2008. Implications for  
577 Kinetochore-Microtubule Attachment from the Structure of an Engineered Ndc80 Complex. Cell 133, 427–  
578 439. <https://doi.org/10.1016/j.cell.2008.03.020>
- 579 Clarke, L., Carbon, J., 1980. Isolation of a yeast centromere and construction of functional small circular  
580 chromosomes. Nature 287, 504–509. <https://doi.org/10.1038/287504a0>
- 581 Cohen, R.L., Espelin, C.W., De Wulf, P., Sorger, P.K., Harrison, S.C., Simons, K.T., 2008. Structural and Functional  
582 Dissection of Mif2p, a Conserved DNA-binding Kinetochore Protein. Mol. Biol. Cell 19, 4480–4491.  
583 <https://doi.org/10.1091/mbc.e08-03-0297>
- 584 Conti, D., Hart, M., Tamura, N., Shrestha, R., Islam, A., Draviam, V.M., 2017. How are Dynamic Microtubules Stably  
585 Tethered to Human Chromosomes? Cytoskeleton - Struct. Dyn. Funct. Dis.  
586 <https://doi.org/10.5772/intechopen.68321>
- 587 Dalal, Y., Furuyama, T., Vermaak, D., Henikoff, S., 2007. Structure, dynamics, and evolution of centromeric  
588 nucleosomes. Proc. Natl. Acad. Sci. 104, 15974. <https://doi.org/10.1073/pnas.0707648104>
- 589 Dani, A., Huang, B., Bergan, J., Dulac, C., Zhuang, X., 2010. Superresolution Imaging of Chemical Synapses in the  
590 Brain. Neuron 68, 843–856. <https://doi.org/10.1016/j.neuron.2010.11.021>



- 591 Deschamps, J., Ries, J., 2020. EMU: reconfigurable graphical user interfaces for Micro-Manager. *BMC Bioinformatics*  
592 21, 456. <https://doi.org/10.1186/s12859-020-03727-8>
- 593 Deschamps, J., Rowald, A., Ries, J., 2016. Efficient homogeneous illumination and optical sectioning for quantitative  
594 single-molecule localization microscopy. *Opt. Express* 24, 28080–28090.
- 595 Dhatchinamoorthy, K., Shivaraju, M., Lange, J.J., Rubinstein, B., Unruh, J.R., Slaughter, B.D., Gerton, J.L., 2017.  
596 Structural plasticity of the living kinetochore. *J. Cell Biol.* 216, 3551–3570.  
597 <https://doi.org/10.1083/jcb.201703152>
- 598 Dimitrova, Y.N., Jenni, S., Valverde, R., Khin, Y., Harrison, S.C., 2016. Structure of the MIND Complex Defines a  
599 Regulatory Focus for Yeast Kinetochore Assembly. *Cell* 167, 1014–1027.  
600 <https://doi.org/10.1016/j.cell.2016.10.011>
- 601 Drinnenberg, I.A., Henikoff, S., Malik, H.S., 2016. Evolutionary Turnover of Kinetochore Proteins: A Ship of Theseus?  
602 *Trends Cell Biol.* 26, 498–510. <https://doi.org/10.1016/j.tcb.2016.01.005>
- 603 Edelstein, A.D., Tsuchida, M.A., Amodaj, N., Pinkard, H., Vale, R.D., Stuurman, N., 2014. Advanced methods of  
604 microscope control using  $\mu$ Manager software. *J. Biol. Methods* 1, e10.  
605 <https://doi.org/10.14440/jbm.2014.36>
- 606 Fischböck-Halwachs, J., Singh, S., Potocnjak, M., Hagemann, G., Solis-Mezarino, V., Woike, S., Ghodgaonkar-Steger,  
607 M., Weissmann, F., Gallego, L.D., Rojas, J., Andreani, J., Köhler, A., Herzog, F., 2019. The COMA complex  
608 interacts with Cse4 and positions Sli15/Ipl1 at the budding yeast inner kinetochore. *eLife* 8, e42879.  
609 <https://doi.org/10.7554/eLife.42879>
- 610 Furuyama, S., Biggins, S., 2007. Centromere identity is specified by a single centromeric nucleosome in budding  
611 yeast. *Proc. Natl. Acad. Sci.* 104, 14706–14711. <https://doi.org/10.1073/pnas.0706985104>
- 612 Gonen, S., Akiyoshi, B., Iadanza, M.G., Shi, D., Duggan, N., Biggins, S., Gonen, T., 2012. The structure of purified  
613 kinetochores reveals multiple microtubule-attachment sites. *Nat. Struct. Mol. Biol.* 19, 925–929.  
614 <https://doi.org/10.1038/nsmb.2358>
- 615 Guse, A., Carroll, C.W., Moree, B., Fuller, C.J., Straight, A.F., 2011. In vitro centromere and kinetochore assembly on  
616 defined chromatin templates. *Nature* 477, 354–358. <https://doi.org/10.1038/nature10379>
- 617 Haase, J., Mishra, P.K., Stephens, A., Haggerty, R., Quammen, C., Taylor, R.M., Yeh, E., Basrai, M.A., Bloom, K., 2013. A  
618 3D Map of the Yeast Kinetochore Reveals the Presence of Core and Accessory Centromere-Specific  
619 Histone. *Curr. Biol.* 23, 1939–1944. <https://doi.org/10.1016/j.cub.2013.07.083>
- 620 Hamilton, G., Dimitrova, Y., Davis, T.N., 2019. Seeing is believing: our evolving view of kinetochore structure,  
621 composition, and assembly. *Curr. Opin. Cell Biol.* 60, 44–52. <https://doi.org/10.1016/j.ceb.2019.03.016>
- 622 Hess, S.T., Girirajan, T.P.K., Mason, M.D., 2006. Ultra-High Resolution Imaging by Fluorescence Photoactivation  
623 Localization Microscopy. *Biophys. J.* 91, 4258–4272. <https://doi.org/10/cr8s93>
- 624 Hinshaw, S.M., Harrison, S.C., 2019. The structure of the Ctf19c/CCAN from budding yeast. *eLife* 8, e44239.  
625 <https://doi.org/10.7554/eLife.44239>
- 626 Hooff, J.J., Tromer, E., Wijk, L.M., Snel, B., Kops, G.J., 2017. Evolutionary dynamics of the kinetochore network in  
627 eukaryotes as revealed by comparative genomics. *EMBO Rep.* 18, 1559–1571.  
628 <https://doi.org/10.15252/embr.201744102>
- 629 Hornung, P., Maier, M., Alushin, G.M., Lander, G.C., Nogales, E., Westermann, S., 2011. Molecular Architecture and  
630 Connectivity of the Budding Yeast Mtw1 Kinetochore Complex. *J. Mol. Biol.* 405, 548–559.  
631 <https://doi.org/10.1016/j.jmb.2010.11.012>
- 632 Hornung, P., Troc, P., Malvezzi, F., Maier, M., Demianova, Z., Zimniak, T., Litos, G., Lampert, F., Schleiffer, A., Brunner,  
633 M., Mechtler, K., Herzog, F., Marlovits, T.C., Westermann, S., 2014. A cooperative mechanism drives  
634 budding yeast kinetochore assembly downstream of CENP-A. *J. Cell Biol.* 206, 509–524.  
635 <https://doi.org/10.1083/jcb.201403081>
- 636 Huis in 't Veld, P.J., Jeganathan, S., Petrovic, A., Singh, P., John, J., Krenn, V., Weissmann, F., Bange, T., Musacchio, A.,  
637 2016. Molecular basis of outer kinetochore assembly on CENP-T. *eLife* 5, e21007.  
638 <https://doi.org/10.7554/eLife.21007>
- 639 Janke, C., Magiera, M.M., Rathfelder, N., Taxis, C., Reber, S., Maekawa, H., Moreno-Borchart, A., Doenges, G., Schwob,  
640 E., Schiebel, E., Knop, M., 2004. A versatile toolbox for PCR-based tagging of yeast genes: new fluorescent  
641 proteins, more markers and promoter substitution cassettes. *Yeast* 21, 947–962.  
642 <https://doi.org/10.1002/yea.1142>
- 643 Jenni, S., Dimitrova, Y.N., Valverde, R., Hinshaw, S.M., Harrison, S.C., 2017. Molecular Structures of Yeast  
644 Kinetochore Subcomplexes and Their Roles in Chromosome Segregation. *Cold Spring Harb. Symp. Quant.*  
645 *Biol.* 82, 83–89. <https://doi.org/10.1101/sqb.2017.82.033738>
- 646 Jenni, S., Harrison, S.C., 2018. Structure of the DASH/Dam1 complex shows its role at the yeast kinetochore-  
647 microtubule interface. *Science* 360, 552–558. <https://doi.org/10.1126/science.aar6436>
- 648 Jin, Q.W., Fuchs, J., Loidl, J., 2000. Centromere clustering is a major determinant of yeast interphase nuclear  
649 organization. *J. Cell Sci.* 113, 1903–1912.
- 650 Joglekar, A.P., Bloom, K., Salmon, E.D., 2009. In Vivo Protein Architecture of the Eukaryotic Kinetochore with  
651 Nanometer Scale Accuracy. *Curr. Biol.* 19, 694–699. <https://doi.org/10.1016/j.cub.2009.02.056>

- 652 Joglekar, A.P., Bloom, K.S., Salmon, E., 2010. Mechanisms of force generation by end-on kinetochore-microtubule  
653 attachments. *Curr. Opin. Cell Biol.* 22, 57–67. <https://doi.org/10.1016/j.ceb.2009.12.010>
- 654 Joglekar, A.P., Bouck, D.C., Molk, J.N., Bloom, K.S., Salmon, E.D., 2006. Molecular architecture of a kinetochore-  
655 microtubule attachment site. *Nat. Cell Biol.* 8, 581–585. <https://doi.org/10.1038/ncb1414>
- 656 Joglekar, A.P., Salmon, E.D., Bloom, K.S., 2008. Counting Kinetochore Protein Numbers in Budding Yeast Using  
657 Genetically Encoded Fluorescent Proteins. *Methods Cell Biol.* 85, 127–151.  
658 [https://doi.org/10.1016/S0091-679X\(08\)85007-8](https://doi.org/10.1016/S0091-679X(08)85007-8)
- 659 Keith, K.C., Fitzgerald-Hayes, M., 2000. *CSE4* Genetically Interacts With the *Saccharomyces cerevisiae* Centromere  
660 DNA Elements CDE I and CDE II but Not CDE III: Implications for the Path of the Centromere DNA Around  
661 a Cse4p Variant Nucleosome. *Genetics* 156, 973–981. <https://doi.org/10.1093/genetics/156.3.973>
- 662 Kim, J., Zelter, A., Umbreit, N.T., Bollozos, A., Riffle, M., Johnson, R., MacCoss, M.J., Asbury, C.L., Davis, T.N., 2017.  
663 The Ndc80 complex bridges two Dam1 complex rings. *eLife* 6, e21069.  
664 <https://doi.org/10.7554/eLife.21069>
- 665 Kim, S.J., Fernandez-Martinez, J., Nudelman, I., Shi, Y., Zhang, W., Raveh, B., Herricks, T., Slaughter, B.D., Hogan, J.A.,  
666 Upla, P., Chemmama, I.E., Pellarin, R., Echeverria, I., Shivaraju, M., Chaudhury, A.S., Wang, J., Williams, R.,  
667 Unruh, J.R., Greenberg, C.H., Jacobs, E.Y., Yu, Z., de la Cruz, M.J., Mironska, R., Stokes, D.L., Aitchison, J.D.,  
668 Jarrold, M.F., Gerton, J.L., Ludtke, S.J., Akey, C.W., Chait, B.T., Sali, A., Rout, M.P., 2018. Integrative structure  
669 and functional anatomy of a nuclear pore complex. *Nature* 555, 475–482.  
670 <https://doi.org/10.1038/nature26003>
- 671 Krassovsky, K., Henikoff, J.G., Henikoff, S., 2012. Tripartite organization of centromeric chromatin in budding yeast.  
672 *Proc. Natl. Acad. Sci.* 109, 243–248. <https://doi.org/10.1073/pnas.1118898109>
- 673 Kudalkar, E.M., Scarborough, E.A., Umbreit, N.T., Zelter, A., Gestaut, D.R., Riffle, M., Johnson, R.S., MacCoss, M.J.,  
674 Asbury, C.L., Davis, T.N., 2015. Regulation of outer kinetochore Ndc80 complex-based microtubule  
675 attachments by the central kinetochore Mis12/MIND complex. *Proc. Natl. Acad. Sci.* 112, E5583–E5589.  
676 <https://doi.org/10.1073/pnas.1513882112>
- 677 Lando, D., Endesfelder, U., Berger, H., Subramanian, L., Dunne, P.D., McColl, J., Klenerman, D., Carr, A.M., Sauer, M.,  
678 Allshire, R.C., Heilemann, M., Laue, E.D., 2012. Quantitative single-molecule microscopy reveals that CENP-  
679 A<sup>Cnp1</sup> deposition occurs during G2 in fission yeast. *Open Biol.* 2, 120078.  
680 <https://doi.org/10.1098/rsob.120078>
- 681 Lang, J., Barber, A., Biggins, S., 2018. An assay for de novo kinetochore assembly reveals a key role for the CENP-T  
682 pathway in budding yeast. *eLife* 7. <https://doi.org/10.7554/eLife.37819>
- 683 Lawrimore, J., Bloom, K.S., Salmon, E.D., 2011. Point centromeres contain more than a single centromere-specific  
684 Cse4 (CENP-A) nucleosome. *J. Cell Biol.* 195, 573–582.
- 685 Leber, V., Nans, A., Singleton, M.R., 2018. Structural basis for assembly of the CBF3 kinetochore complex. *EMBO J.*  
686 37, 269–281. <https://doi.org/10.15252/emboj.201798134>
- 687 Malvezzi, F., Litos, G., Schleiffer, A., Heuck, A., Mechtler, K., Clausen, T., Westermann, S., 2013. A structural basis for  
688 kinetochore recruitment of the Ndc80 complex via two distinct centromere receptors. *EMBO J.* 32, 409–  
689 423. <https://doi.org/10.1038/emboj.2012.356>
- 690 McEvoy, A.L., Hoi, H., Bates, M., Platonova, E., Cranfill, P.J., Baird, M.A., Davidson, M.W., Ewers, H., Liphardt, J.,  
691 Campbell, R.E., 2012. mMaple: A Photoconvertible Fluorescent Protein for Use in Multiple Imaging  
692 Modalities. *PLoS ONE* 7, e51314. <https://doi.org/10.1371/journal.pone.0051314>
- 693 McIntosh, J.R., O'Toole, E., Zhudenkova, K., Morphew, M., Schwartz, C., Ataulakhov, F.I., Grishchuk, E.L., 2013.  
694 Conserved and divergent features of kinetochores and spindle microtubule ends from five species. *J. Cell*  
695 *Biol.* 200, 459–474. <https://doi.org/10.1083/jcb.201209154>
- 696 McKinley, K.L., Sekulic, N., Guo, L.Y., Tsinman, T., Black, B.E., Cheeseman, I.M., 2015. The CENP-L-N Complex Forms  
697 a Critical Node in an Integrated Meshwork of Interactions at the Centromere-Kinetochore Interface. *Mol.*  
698 *Cell* 60, 886–898. <https://doi.org/10.1016/j.molcel.2015.10.027>
- 699 Mizuguchi, G., Xiao, H., Wisniewski, J., Smith, M.M., Wu, C., 2007. Nonhistone Scm3 and Histones CenH3-H4  
700 Assemble the Core of Centromere-Specific Nucleosomes. *Cell* 129, 1153–1164.  
701 <https://doi.org/10.1016/j.cell.2007.04.026>
- 702 Mund, M., van der Beek, J.A., Deschamps, J., Dmitrieff, S., Hoess, P., Monster, J.L., Picco, A., Nédélec, F., Kaksonen, M.,  
703 Ries, J., 2018. Systematic Nanoscale Analysis of Endocytosis Links Efficient Vesicle Formation to Patterned  
704 Actin Nucleation. *Cell* 174, 884–896.e17. <https://doi.org/10.1016/j.cell.2018.06.032>
- 705 Musacchio, A., Desai, A., 2017. A Molecular View of Kinetochore Assembly and Function. *Biology* 6, 5.  
706 <https://doi.org/10.3390/biology6010005>
- 707 Ng, C.T., Deng, L., Chen, C., Lim, H.H., Shi, J., Surana, U., Gan, L., 2018. Electron cryotomography analysis of  
708 Dam1C/DASH at the kinetochore–spindle interface in situ. *J. Cell Biol.* 218, 455–473.  
709 <https://doi.org/10.1083/jcb.201809088>
- 710 Ng, R., Carbon, J., 1987. Mutational and in vitro protein-binding studies on centromere DNA from *Saccharomyces*  
711 *cerevisiae*. *Mol. Cell. Biol.* 7, 4522–4534. <https://doi.org/10.1128/MCB.7.12.4522>

- 712 Pekköz Altunkaya, G., Malvezzi, F., Demianova, Z., Zimniak, T., Litos, G., Weissmann, F., Mechtler, K., Herzog, F.,  
713 Westermann, S., 2016. CCAN Assembly Configures Composite Binding Interfaces to Promote Cross-  
714 Linking of Ndc80 Complexes at the Kinetochores. *Curr. Biol.* 26, 2370–2378.  
715 <https://doi.org/10.1016/j.cub.2016.07.005>
- 716 Pentakota, S., Zhou, K., Smith, C., Maffini, S., Petrovic, A., Morgan, G.P., Weir, J.R., Vetter, I.R., Musacchio, A., Luger,  
717 K., 2017. Decoding the centromeric nucleosome through CENP-N. *eLife* 6, e33442.  
718 <https://doi.org/10.7554/eLife.33442>
- 719 Pesenti, M.E., Raisch, T., Conti, D., Walstein, K., Hoffmann, I., Vogt, D., Prumbaum, D., Vetter, I.R., Raunser, S.,  
720 Musacchio, A., 2022. Structure of the human inner kinetochore CCAN complex and its significance for  
721 human centromere organization. *Mol. Cell* 82, 2113–2131. <https://doi.org/10.1016/j.molcel.2022.04.027>
- 722 Petrovic, A., Keller, J., Liu, Y., Overlack, K., John, J., Dimitrova, Y.N., Jenni, S., van Gerwen, S., Stege, P., Wohlgemuth,  
723 S., Rombaut, P., Herzog, F., Harrison, S.C., Vetter, I.R., Musacchio, A., 2016. Structure of the MIS12 Complex  
724 and Molecular Basis of Its Interaction with CENP-C at Human Kinetochores. *Cell* 167, 1028–1040.  
725 <https://doi.org/10.1016/j.cell.2016.10.005>
- 726 Petrovic, A., Mosalaganti, S., Keller, J., Mattiuzzo, M., Overlack, K., Krenn, V., De Antoni, A., Wohlgemuth, S.,  
727 Cecatiello, V., Pasqualato, S., Raunser, S., Musacchio, A., 2014. Modular Assembly of RWD Domains on the  
728 Mis12 Complex Underlies Outer Kinetochore Organization. *Mol. Cell* 53, 591–605.  
729 <https://doi.org/10.1016/j.molcel.2014.01.019>
- 730 Przewloka, M.R., Venkei, Z., Bolanos-Garcia, V.M., Debski, J., Dadlez, M., Glover, D.M., 2011. CENP-C Is a Structural  
731 Platform for Kinetochore Assembly. *Curr. Biol.* 21, 399–405. <https://doi.org/10.1016/j.cub.2011.02.005>
- 732 Ramey, V.H., Wang, H.-W., Nakajima, Y., Wong, A., Liu, J., Drubin, D., Barnes, G., Nogales, E., 2011. The Dam1 ring  
733 binds to the E-hook of tubulin and diffuses along the microtubule. *Mol. Biol. Cell* 22, 457–466.  
734 <https://doi.org/10.1091/mbc.E10-10-0841>
- 735 Rieder, C.L., 1982. The Formation, Structure, and Composition of the Mammalian Kinetochore and Kinetochore  
736 Fiber, in: *International Review of Cytology*. Elsevier, pp. 1–58. [https://doi.org/10.1016/S0074-7696\(08\)61672-1](https://doi.org/10.1016/S0074-7696(08)61672-1)
- 737
- 738 Ries, J., 2020. SMAP: a modular super-resolution microscopy analysis platform for SMLM data. *Nat. Methods* 17,  
739 870–872. <https://doi.org/10.1038/s41592-020-0938-1>
- 740 Rust, M.J., Bates, M., Zhuang, X., 2006. Sub-diffraction-limit imaging by stochastic optical reconstruction  
741 microscopy (STORM). *Nat. Methods* 3, 793–795. <https://doi.org/10/fwrhq3>
- 742 Santaguida, S., Amon, A., 2015. Short- and long-term effects of chromosome mis-segregation and aneuploidy. *Nat.*  
743 *Rev. Mol. Cell Biol.* 16, 473–485. <https://doi.org/10.1038/nrm4025>
- 744 Schmitzberger, F., Richter, M.M., Gordiyenko, Y., Robinson, C.V., Dadlez, M., Westermann, S., 2017. Molecular basis  
745 for inner kinetochore configuration through RWD domain-peptide interactions. *EMBO J.* 36, 3458–3482.  
746 <https://doi.org/10.15252/embj.201796636>
- 747 Scott, K.C., Bloom, K.S., 2014. Lessons learned from counting molecules: how to lure CENP-A into the kinetochore.  
748 *Open Biol.* 4, 140191. <https://doi.org/10.1098/rsob.140191>
- 749 Screpanti, E., De Antoni, A., Alushin, G.M., Petrovic, A., Melis, T., Nogales, E., Musacchio, A., 2011. Direct Binding of  
750 Cenp-C to the Mis12 Complex Joins the Inner and Outer Kinetochore. *Curr. Biol.* 21, 391–398.  
751 <https://doi.org/10.1016/j.cub.2010.12.039>
- 752 Shivaraju, M., Unruh, J.R., Slaughter, B.D., Mattingly, M., Berman, J., Gerton, J.L., 2012. Cell-Cycle-Coupled Structural  
753 Oscillation of Centromeric Nucleosomes in Yeast. *Cell* 150, 304–316.  
754 <https://doi.org/10.1016/j.cell.2012.05.034>
- 755 Sieben, C., Banterle, N., Douglass, K.M., Gönczy, P., Manley, S., 2018. Multicolor single-particle reconstruction of  
756 protein complexes. *Nat. Methods* 15, 777–780. <https://doi.org/10.1038/s41592-018-0140-x>
- 757 Sochacki, K.A., Dickey, A.M., Strub, M.-P., Taraska, J.W., 2017. Endocytic proteins are partitioned at the edge of the  
758 clathrin lattice in mammalian cells. *Nat. Cell Biol.* 19, 352–361. <https://doi.org/10/f9vxd5>
- 759 Sun, X., Zhang, A., Baker, B., Sun, L., Howard, A., Buswell, J., Maurel, D., Masharina, A., Johnsson, K., Noren, C.J., Xu,  
760 M.-Q., Corrêa, I.R., 2011. Development of SNAP-tag fluorogenic probes for wash-free fluorescence imaging.  
761 *Chembiochem Eur. J. Chem. Biol.* 12, 2217–2226.
- 762 Szymborska, A., Marco, A. de, Daigle, N., Cordes, V.C., Briggs, J.A.G., Ellenberg, J., 2013. Nuclear Pore Scaffold  
763 Structure Analyzed by Super-Resolution Microscopy and Particle Averaging. *Science* 341, 655–658.  
764 <https://doi.org/10.1126/science.1240672>
- 765 Thevathasan, J.V., Kahnwald, M., Cieśliński, K., Hoess, P., Peneti, S.K., Reitberger, M., Heid, D., Kasuba, K.C., Hoerner,  
766 S.J., Li, Y., Wu, Y.-L., Mund, M., Matti, U., Pereira, P.M., Henriques, R., Nijmeijer, B., Kueblbeck, M., Sabinina,  
767 V.J., Ellenberg, J., Ries, J., 2019. Nuclear pores as versatile reference standards for quantitative  
768 superresolution microscopy. *Nat. Methods* 16, 1045–1053. <https://doi.org/10/gf85h3>
- 769 Ustinov, N.B., Korshunova, A.V., Gudimchuk, N.B., 2020. Protein Complex NDC80: Properties, Functions, and  
770 Possible Role in Pathophysiology of Cell Division. *Biochem. Mosc.* 85, 448–462.  
771 <https://doi.org/10.1134/S0006297920040057>

- 772 Valverde, R., Ingram, J., Harrison, S.C., 2016. Conserved Tetramer Junction in the Kinetochore Ndc80 Complex. *Cell*  
773 *Rep.* 17, 1915–1922. <https://doi.org/10.1016/j.celrep.2016.10.065>
- 774 Virant, D., Vojnovic, I., Winkelmeier, J., Endesfelder, M., Turkowyd, B., Lando, D., Endesfelder, U., 2021. Unraveling  
775 the kinetochore nanostructure in *Schizosaccharomyces pombe* using multi-color single-molecule  
776 localization microscopy. *bioRxiv* 2021.12.01.469981. <https://doi.org/10.1101/2021.12.01.469981>
- 777 Walstein, K., Petrovic, A., Pan, D., Hagemeier, B., Vogt, D., Vetter, I.R., Musacchio, A., 2021. Assembly principles and  
778 stoichiometry of a complete human kinetochore module. *Sci. Adv.* 7, eabg1037.  
779 <https://doi.org/10.1126/sciadv.abg1037>
- 780 Watanabe, R., Hara, M., Okumura, E., Hervé, S., Fachinetti, D., Ariyoshi, M., Fukagawa, T., 2019. CDK1-mediated  
781 CENP-C phosphorylation modulates CENP-A binding and mitotic kinetochore localization. *J. Cell Biol.* 218,  
782 4042–4062. <https://doi.org/10.1083/jcb.201907006>
- 783 Wei, R.R., Al-Bassam, J., Harrison, S.C., 2007. The Ndc80/HEC1 complex is a contact point for kinetochore-  
784 microtubule attachment. *Nat. Struct. Mol. Biol.* 14, 54–59. <https://doi.org/10.1038/nsmb1186>
- 785 Wei, R.R., Sorger, P.K., Harrison, S.C., 2005. Molecular organization of the Ndc80 complex, an essential kinetochore  
786 component. *Proc. Natl. Acad. Sci.* 102, 5363–5367. <https://doi.org/10.1073/pnas.0501168102>
- 787 Winey, M., Mamay, C.L., O’Toole, E.T., Mastronarde, D.N., Giddings, T.H., Jr, McDonald, K.L., McIntosh, J.R., 1995.  
788 Three-dimensional ultrastructural analysis of the *Saccharomyces cerevisiae* mitotic spindle. *J. Cell Biol.*  
789 129, 1601–1615. <https://doi.org/10.1083/jcb.129.6.1601>
- 790 Wisniewski, J., Hajj, B., Chen, J., Mizuguchi, G., Xiao, H., Wei, D., Dahan, M., Wu, C., Kadonaga, J.T., 2014. Imaging the  
791 fate of histone Cse4 reveals de novo replacement in S phase and subsequent stable residence at  
792 centromeres. *eLife* 3, e02203.
- 793 Yan, K., Yang, J., Zhang, Z., McLaughlin, S.H., Chang, L., Fasci, D., Ehrenhofer-Murray, A.E., Heck, A.J.R., Barford, D.,  
794 2019. Structure of the inner kinetochore CCAN complex assembled onto a centromeric nucleosome.  
795 *Nature* 574, 278–282. <https://doi.org/10.1038/s41586-019-1609-1>
- 796 Yan, K., Zhang, Z., Yang, J., McLaughlin, S.H., Barford, D., 2018. Architecture of the CBF3–centromere complex of the  
797 budding yeast kinetochore. *Nat. Struct. Mol. Biol.* 25, 1103–1110. <https://doi.org/10.1038/s41594-018-0154-1>
- 798
- 799 Yatskevich, S., Muir, K.W., Bellini, D., Zhang, Z., Yang, J., Tischler, T., Predin, M., Dendooven, T., McLaughlin, S.H.,  
800 Barford, D., 2022. Structure of the human inner kinetochore bound to a centromeric CENP-A nucleosome.  
801 *Science* 376, 844–852. <https://doi.org/10.1126/science.abn3810>
- 802 Zhang, W., Lukyanova, N., Miah, S., Lucas, J., Vaughan, C.K., 2018. Insights into Centromere DNA Bending Revealed  
803 by the Cryo-EM Structure of the Core Centromere Binding Factor 3 with Ndc10. *Cell Rep.* 24, 744–754.  
804 <https://doi.org/10.1016/j.celrep.2018.06.068>
- 805 Zinkowski, R.P., Meyne, J., Brinkley, B.R., 1991. The centromere-kinetochore complex: a repeat subunit model. *J.*  
806 *Cell Biol.* 113, 1091–1110. <https://doi.org/10.1083/jcb.113.5.1091>

807

808

## Supplementary Figures

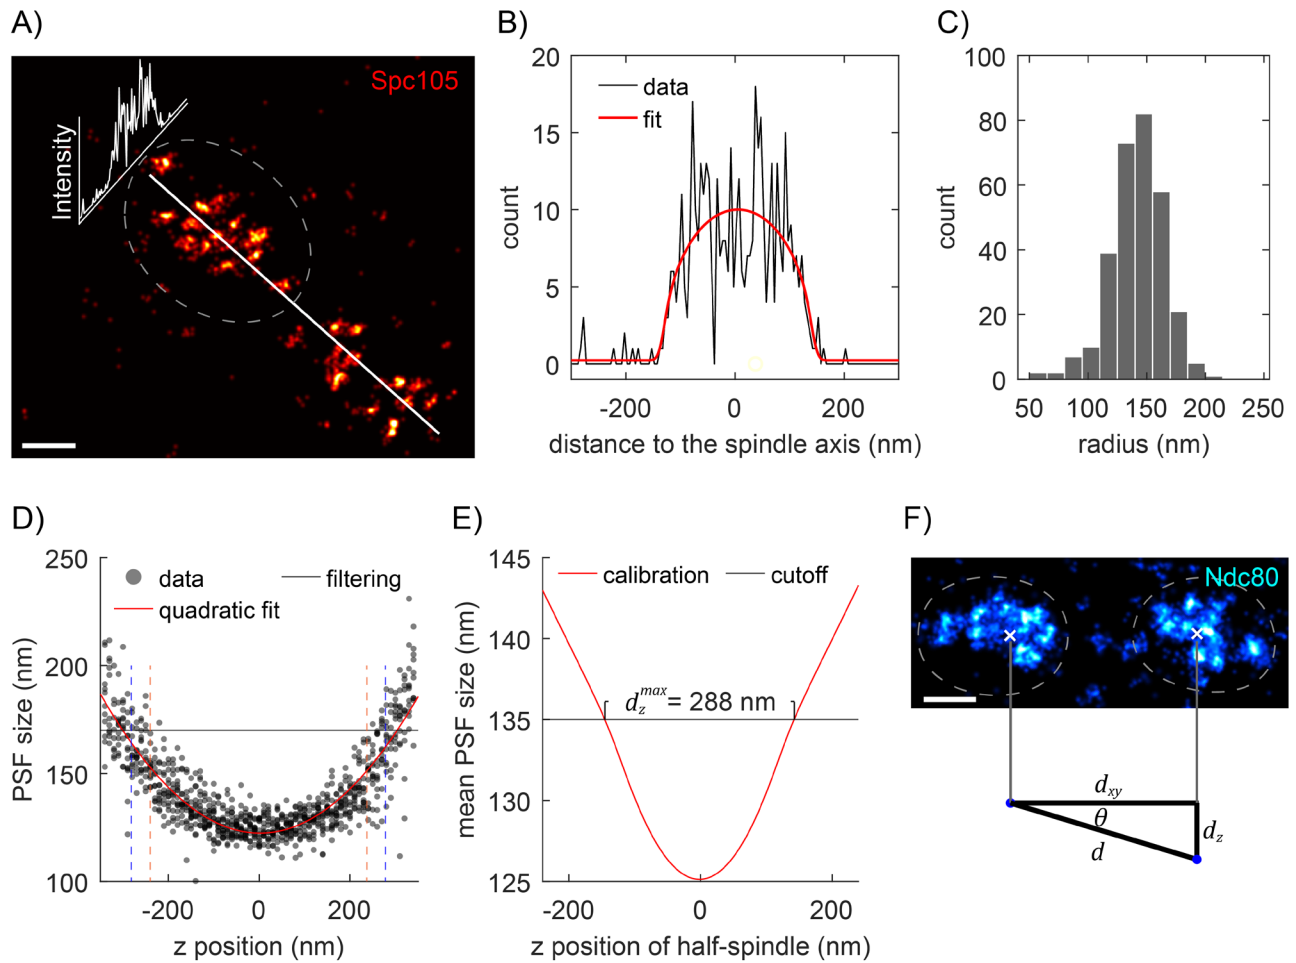

809

810 **Figure S1. The basis for defining the values for filtering and quality control. A-C. Quantifying the width of**  
 811 **kinetochore clusters.** As shown with the example kinetochore cluster (A), its profile perpendicular to the axis of spindle  
 812 (B) was fitted with a cylindrical model (red) to quantify the radius. **C. The radius of analyzed kinetochore clusters.** The  
 813 mean radius was quantified as  $142.0 \pm 23.7$  (standard deviation) nm, which corresponds to the width (diameter) of 284  
 814 nm. Sample size: 301 kinetochore clusters. **D. The calibration curve (red) relating z positions to PSF size based on**  
 815 **bead data (dots).** For filtering out out-of-focus localizations, the maximum PSF size of 170 nm is defined, which  
 816 corresponds to an axial range from -300 to 300 nm. The z ranges bounded by the vertical dashed lines with the same  
 817 colors [mean PSF size cutoff: 130 nm (orange), 135 nm (blue)] are where kinetochore proteins can be found, given the  
 818 corresponding mean PSF size cutoffs of kinetochore clusters, taking the quantified width in (C) into account. Both cutoffs  
 819 ensure that no analyzed kinetochore protein exceeds the imaging depth determined by the PSF size filtering. **E. The**  
 820 **calibration curve relating the z position of a kinetochore cluster to its mean PSF size,** based on the bead calibration  
 821 in (D). The maximal axial distance between kinetochore clusters in the same pairs  $d_z^{max}$  is estimated to be 288 nm, given  
 822 that the maximal allowed mean PSF size is 135 nm. **F. The relation between the lateral distance  $d_{xy}$ , the axial distance**  
 823  **$d_z$ , and the estimated distance between kinetochore clusters in the same pairs  $d$  in 3D.** Based on the dataset (Ndc80)  
 824 with the largest sample size, the mean lateral distance between kinetochore clusters in the same pairs  $\overline{d_{xy}}$  is measured as  
 825 777 nm. These correspond to the maximum tilt angle  $\theta^{max} = 20.3^\circ$ , and the maximum tilt-introduced error of the distance  
 826 between the kinetochore clusters  $\epsilon^{max} = 6.3\%$ , and the mean error  $\bar{\epsilon} = 2.1\%$ . See Methods for the calculations. Sample  
 827 size: 50 kinetochore clusters. Scale bars: 200 nm.

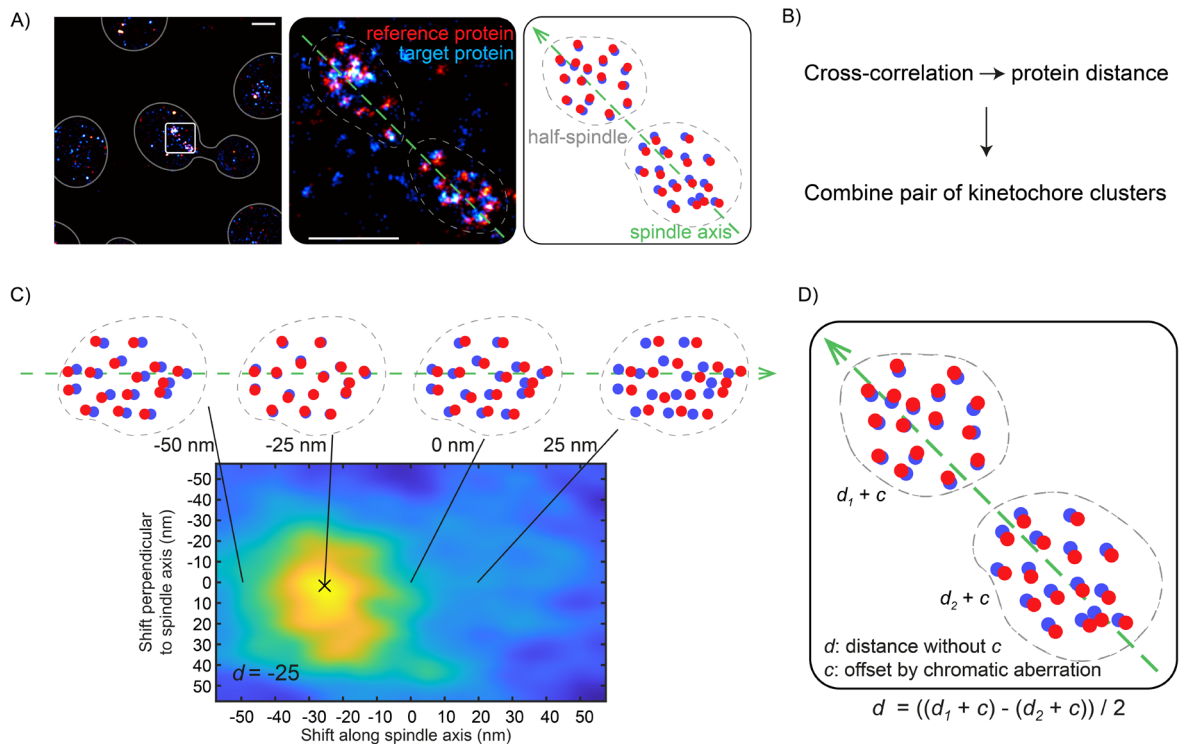

828

829 **Figure S2. Workflow of quantifying the distances between kinetochore proteins.** **A.** Metaphase spindles (white box)  
 830 with both half spindles close to the focus are manually segmented (dashed contour). The spindle axis for each spindle is  
 831 manually annotated (green dashed line). A schematic (right panel) is provided for clarity. **B.** The overview of the workflow.  
 832 **C.** The distance between the target and reference proteins is quantified using the cross-correlation analysis. This analysis  
 833 is applied to each kinetochore cluster and yields a correlation map showing the similarity between the two channels at  
 834 certain lateral and axial shifts of the reference channel. The shift along spindle axis at the maximum is quantified as the  
 835 distance  $d$ . **D.** To eliminate the potential offset  $c$  caused by the chromatic aberration, the average distances  $d$  of both paired  
 836 kinetochore clusters, having the distances  $d_1$  and  $d_2$  respectively, is then calculated per spindle.

837

838

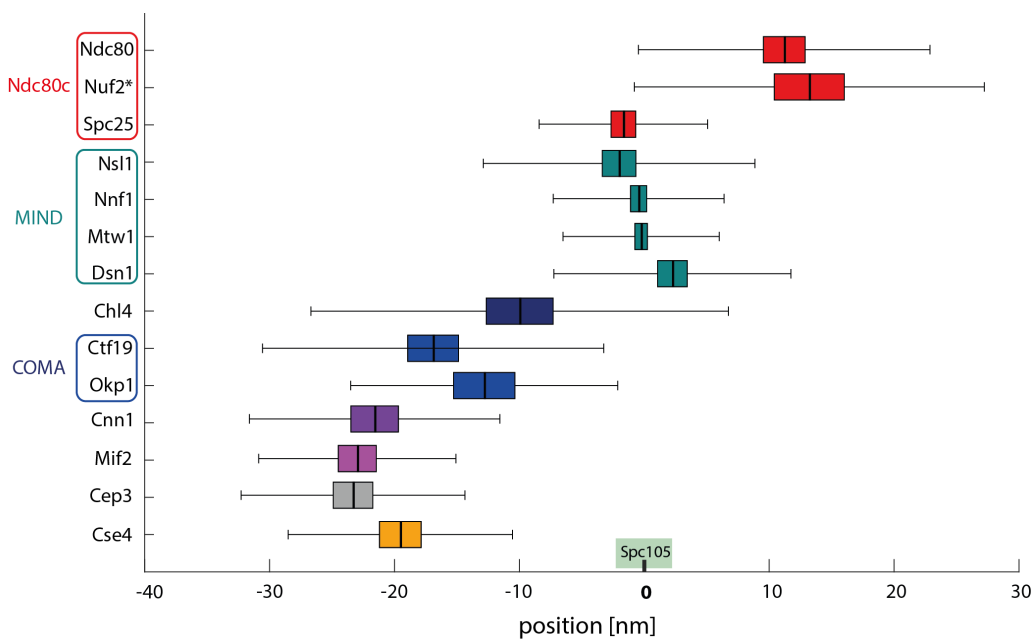

839

840 **Figure S3. An independent analysis of intra-kinetochore distances based on manually picked single kinetochores.**  
 841 The mean distance is plotted with standard error of the mean - SEM (as colored box) and standard deviation - SD  
 842 (whiskers). Nuf2\* - the position of Nuf2 was estimated based on Nuf2-Ndc80 distance measurements.

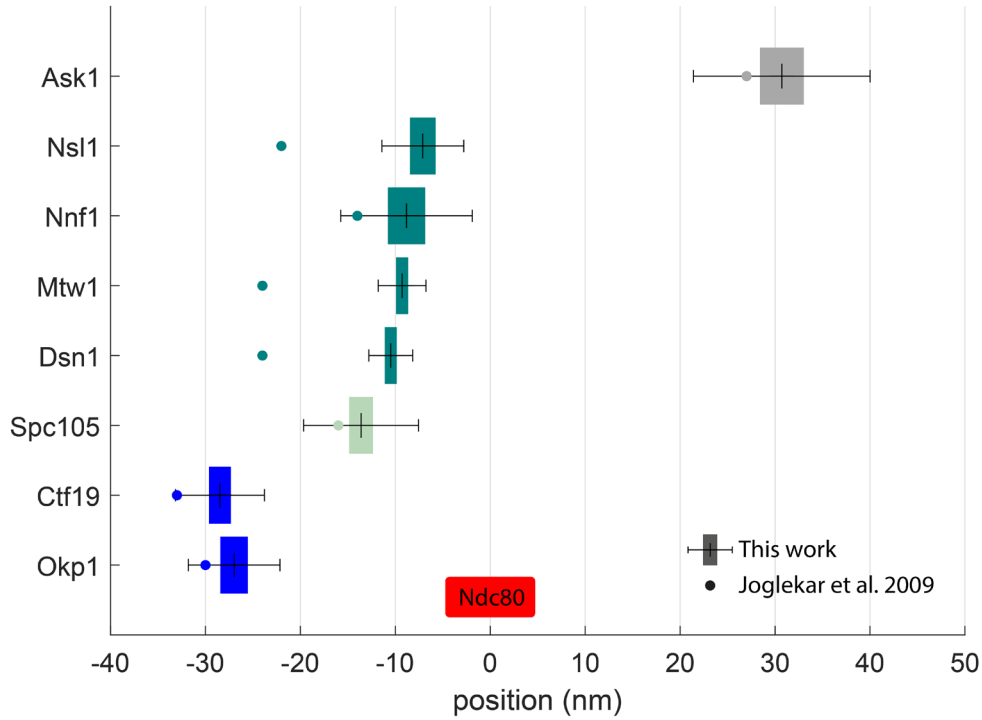

843  
844 **Figure S4. Comparison of the available distance measurements to Joglekar et al. 2009.** The mean distance is plotted  
845 with standard error of the mean - SEM (as colored box) and standard deviation - SD (whiskers). The corresponding mean  
846 values reported by Joglekar et al. 2009 are shown as dots.

847

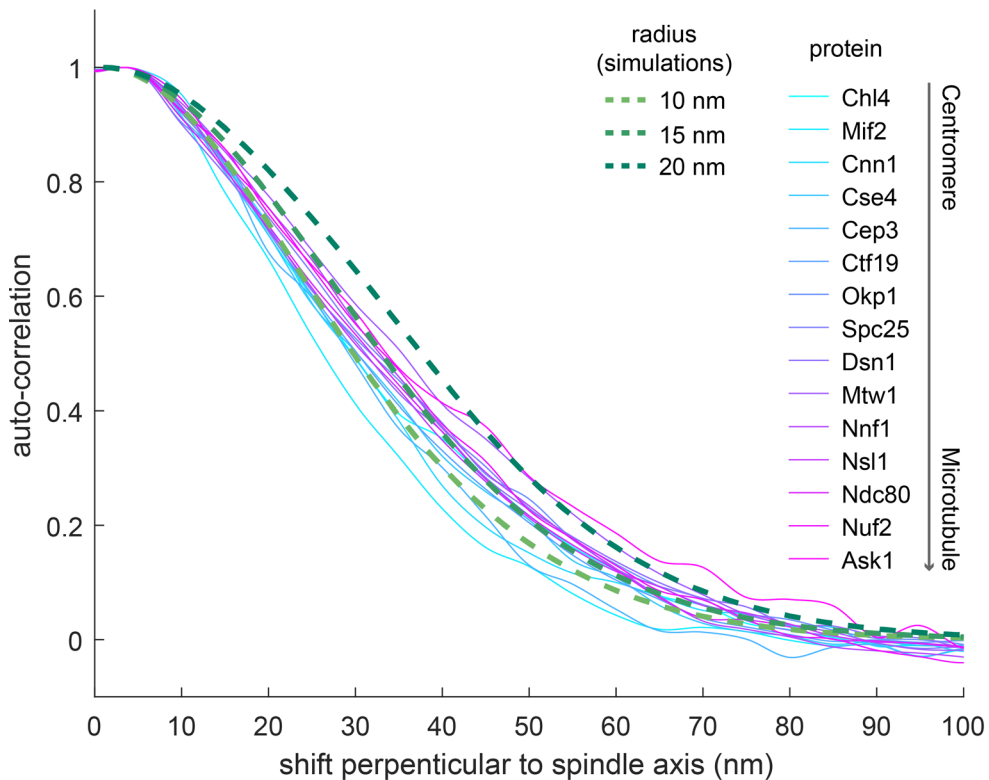

848  
849 **Figure S5. Auto-correlation perpendicular to the spindle axis.** Solid curves are average auto-correlation profiles of  
850 kinetochore proteins. Dashed lines are auto-correlation profiles of simulated ring distributions with corresponding radii,  
851 considering the overall distribution of the experimental localization precision.

852

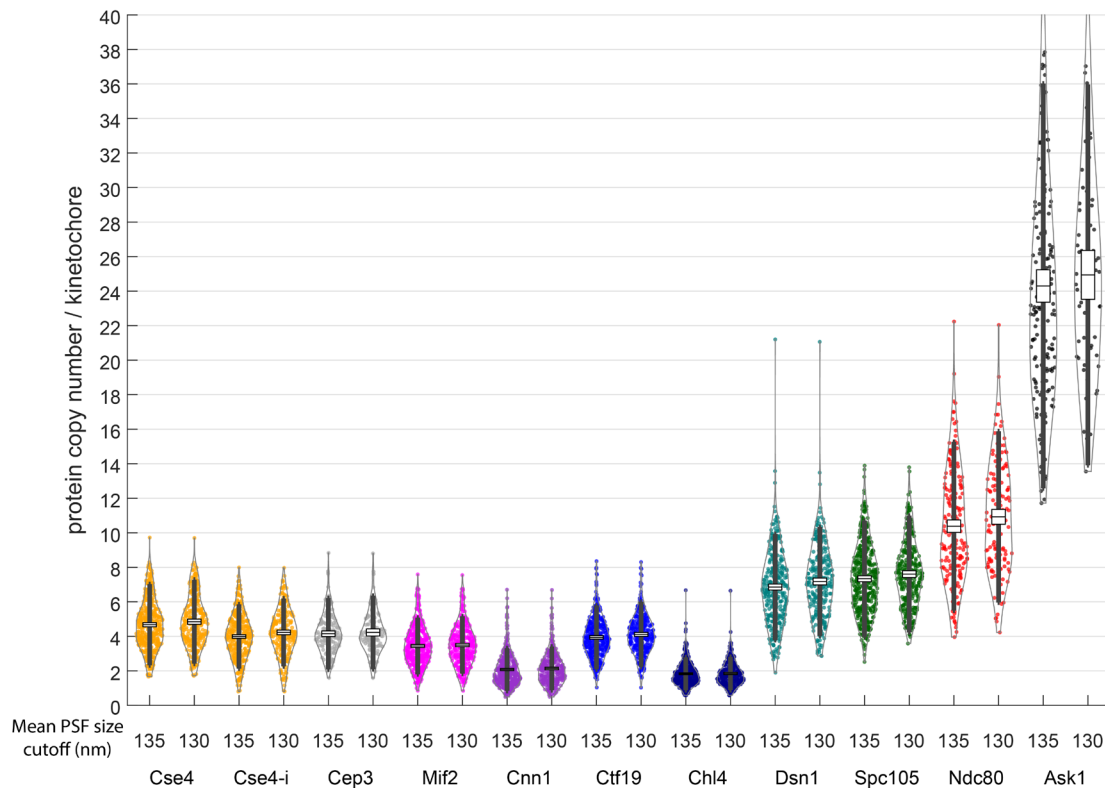

853  
854  
855  
856  
857  
858

**Figure S6. Protein copy numbers per kinetochore measured with different mean PSF size cutoffs of kinetochore clusters (135 and 130 nm) to investigate the robustness of the molecular counting.** The mean protein copy numbers calculated based on both cutoffs are almost identical, showing that the analysis is robust. Each data point corresponds to one kinetochore cluster. Boxes denote average copy numbers and standard error of means, and whiskers denote standard deviations.

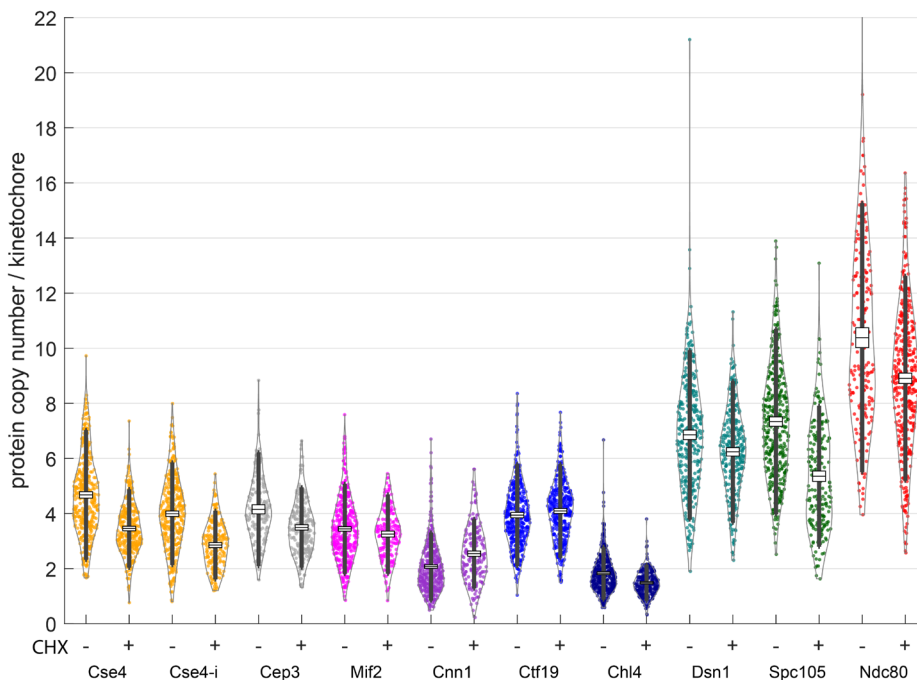

859

860 **Figure S7. Protein copy numbers per kinetochore measured with and without cycloheximide (CHX) treatment (250**  
861 **ug/ml, 60 min), respectively, to investigate the effect of protein maturation.** Each data point corresponds to one kinetochore  
862 **cluster. Boxes denote average copy numbers and standard error of means, and whiskers denote standard deviations.**

863



864  
865  
866  
867

## Supplementary Tables

**Table S1. Comparison of the available distance measurements from this article and Joglekar et al. 2009. Due to differences in reference points all distances were unified to the distance from Ndc80 C-terminus for clarity.**

| Protein pair (with Ndc80) | Distances (nm) |                      |
|---------------------------|----------------|----------------------|
|                           | This work      | Joglekar et al. 2009 |
| Ask1                      | 30.7           | 27                   |
| Spc105                    | -13.6          | -16                  |
| Nsl1                      | -7.1           | -22                  |
| Nnf1                      | -8.8           | -14                  |
| Mtw1                      | -9.3           | -24                  |
| Dsn1                      | -10.5          | -24                  |
| Ctf19                     | -28.5          | -33                  |
| Okp1                      | -27.0          | -30                  |

868  
869  
870

**Table S2 The table represents the yeast strains created and used in this study. All are based on the MKY100 strain (S288c derivative; Kaksonen Lab) with the following genetic background: MATa, ura3-52, his3Δ200, leu3-52, lys2-801.**

| Strain name                        | Genotype                                                     |
|------------------------------------|--------------------------------------------------------------|
| Spc42-GFP/Ndc80-SNAP/Ask1-mMaple   | SPC42-GFP::kanMX4, SPC105-SNAP::hphNT1,ASK1-mMaple::HIS3MX6  |
| Spc42-GFP/Spc105-SNAP/Cep3-mMaple  | SPC42-GFP::kanMX4, SPC105-SNAP::hphNT1,CEP3-mMaple::HIS3MX6  |
| Spc42-GFP/Spc105-SNAP/Cse4-mMaple  | SPC42-GFP::kanMX4, SPC105-SNAP::hphNT1,CSE4-mMaple::HIS3MX6  |
| Spc42-GFP/Spc105-SNAP/Cnn1-mMaple  | SPC42-GFP::kanMX4, SPC105-SNAP::hphNT1,CNN1-mMaple::HIS3MX6  |
| Spc42-GFP/Spc105-SNAP/Chl4-mMaple  | SPC42-GFP::kanMX4, SPC105-SNAP::hphNT1,CHL4-mMaple::HIS3MX6  |
| Spc42-GFP/Spc105-SNAP/Ctf19-mMaple | SPC42-GFP::kanMX4, SPC105-SNAP::hphNT1,CTF19-mMaple::HIS3MX6 |
| Spc42-GFP/Spc105-SNAP/Dsn1-mMaple  | SPC42-GFP::kanMX4, SPC105-SNAP::hphNT1,DSN1-mMaple::HIS3MX6  |
| Spc42-GFP/Spc105-SNAP/Mif2-mMaple  | SPC42-GFP::kanMX4, SPC105-SNAP::hphNT1,MIF2-mMaple::HIS3MX6  |
| Spc42-GFP/Spc105-SNAP/Mtw1-mMaple  | SPC42-GFP::kanMX4, SPC105-SNAP::hphNT1,MTW1-mMaple::HIS3MX6  |
| Spc42-GFP/Spc105-SNAP/Ndc80-mMaple | SPC42-GFP::kanMX4, SPC105-SNAP::hphNT1,NDC80-mMaple::HIS3MX6 |
| Spc42-GFP/Spc105-SNAP/Nnf1-mMaple  | SPC42-GFP::kanMX4, SPC105-SNAP::hphNT1,NNF1-mMaple::HIS3MX6  |
| Spc42-GFP/Spc105-SNAP/Nsl1-mMaple  | SPC42-GFP::kanMX4, SPC105-SNAP::hphNT1,NSL1-mMaple::HIS3MX6  |
| Spc42-GFP/Spc105-SNAP/Spc25-mMaple | SPC42-GFP::kanMX4, SPC105-SNAP::hphNT1,SPC25-mMaple::HIS3MX6 |
| Spc42-GFP/Ndc80-SNAP/Ctf19-mMaple  | SPC42-GFP::kanMX4, SPC105-SNAP::hphNT1,CTF19-mMaple::HIS3MX6 |
| Ndc80-SNAP/Nuf2-mMaple             | NDC80-SNAP::hphNT1, NUF2-mMaple::HIS3MX6                     |
| Ndc80-GFP/Cep3-mMaple              | NDC80-GFP::kanMX4, CEP3-mMaple::HIS3MX6                      |
| Ndc80-GFP/Cse4-mMaple              | NDC80-GFP::kanMX4, CSE4-mMaple::HIS3MX6                      |
| Ndc80-GFP/Cse4-mMaple-Cse4         | NDC80-GFP::kanMX4, cse4::CSE4-mMaple-CSE4::HIS3MX6           |
| Ndc80-GFP/Cnn1-mMaple              | NDC80-GFP::kanMX4, CNN1-mMaple::HIS3MX6                      |
| Ndc80-GFP/Chl4-mMaple              | NDC80-GFP::kanMX4, CHL4-mMaple::HIS3MX6                      |
| Ndc80-GFP/Ctf19-mMaple             | NDC80-GFP::kanMX4, CTF19-mMaple::HIS3MX6                     |
| Ndc80-GFP/Dsn1-mMaple              | NDC80-GFP::kanMX4, DSN1-mMaple::HIS3MX6                      |
| Ndc80-GFP/Mif2-mMaple              | NDC80-GFP::kanMX4, MIF2-mMaple::HIS3MX6                      |
| Ndc80-GFP/ Mtw1-mMaple             | NDC80-GFP::kanMX4, MTW1-mMaple::HIS3MX6                      |
| Spc42-GFP/Ndc80-mMaple             | SPC42-GFP::kanMX4, NDC80-mMaple::HIS3MX6                     |

|                         |                                          |
|-------------------------|------------------------------------------|
| Ndc80-GFP/ Nnf1-mMaple  | NDC80-GFP::kanMX4, NNF1-mMaple::HIS3MX6  |
| Ndc80-GFP/ Nsl1-mMaple  | NDC80-GFP::kanMX4, NSL1-mMaple::HIS3MX6  |
| Ndc80-GFP/ Spc25-mMaple | NDC80-GFP::kanMX4, SPC25-mMaple::HIS3MX6 |
| Abp1-GFP/Nup188-mMaple  | ABP1-GFP::kanMX4, NUP188-mMaple::HIS3MX6 |

871

872

873

**Table S3. Additional information about the dual-color SMLM experiments.** For each protein of interest, the number of performed experiments, ROIs and kinetochore spindles are depicted.

| Protein     | Number of experiments | Number of ROIs | Number of kinetochore spindles |
|-------------|-----------------------|----------------|--------------------------------|
| Ask1        | 12                    | 30             | 15                             |
| Nuf2        | 5                     | 10             | 5                              |
| Ndc80       | 18                    | 50             | 25                             |
| Nsl1        | 7                     | 16             | 8                              |
| Nnf1        | 6                     | 14             | 7                              |
| Mtw1        | 15                    | 34             | 17                             |
| Dsn1        | 12                    | 26             | 13                             |
| Spc25       | 11                    | 26             | 13                             |
| Okp1        | 11                    | 24             | 12                             |
| Ctf19       | 6                     | 16             | 8                              |
| Cep3        | 6                     | 12             | 6                              |
| Cse4        | 10                    | 20             | 10                             |
| Cnn1        | 8                     | 16             | 8                              |
| Mif2        | 10                    | 20             | 10                             |
| Ctf19-Ndc80 | 17                    | 46             | 23                             |

874

875

876

**Table S4. Calibration factors for protein counting.** The factor is the ratio between number of localizations and the copy number of Nup188 (16 copies) per NPC.

| Protein | Replicate | Calibration factor |
|---------|-----------|--------------------|
| Ask1    | 1         | 0.89               |
|         | 2         | 1.02               |
| Ndc80   | 1         | 1.22               |
|         | 2         | 1.56               |
| Spc105  | 1         | 1.26               |
|         | 2         | 1.29               |
| Dsn1    | 1         | 1.15               |
|         | 2         | 1.51               |
| Chl4    | 1         | 1.42               |
|         | 2         | 1.17               |
| Ctf19   | 1         | 1.20               |
|         | 2         | 1.50               |
| Cnn1    | 1         | 1.14               |
|         | 2         | 1.34               |
| Mif2    | 1         | 1.15               |
|         | 2         | 1.25               |
| Cep3    | 1         | 1.46               |
|         | 2         | 1.22               |
| Cse4-i  | 1         | 1.38               |
|         | 2         | 1.24               |
| Cse4    | 1         | 1.20               |
|         | 2         | 1.23               |

877
